1           **Pragmatic selection of larval mosquito diets for**  
2           **insectary rearing of *Anopheles gambiae* and**  
3                           ***Aedes aegypti***

4  
5   Short title: Larval mosquito diets for *An. gambiae* and *Ae. aegypti*

6  
7   Mark Q. Benedict<sup>1\*</sup>, Catherine M. Hunt<sup>1</sup>, Michael G. Vella<sup>2</sup>, Kasandra M. Gonzalez<sup>2</sup>, Ellen M.  
8   Dotson<sup>1</sup>, C. Matilda Collins<sup>3</sup>

9   <sup>1</sup> Centers for Disease Control and Prevention, Division of Parasitic Diseases and Malaria,  
10   Entomology Branch, Atlanta, Georgia, United States of America

11   <sup>2</sup> Frontier Scientific Services, Newark, Delaware, United States of America

12   <sup>3</sup> Centre for Environmental Policy, Imperial College London, United Kingdom

13   \* Corresponding author

14   Email: [mbenedict@cdc.gov](mailto:mbenedict@cdc.gov)

15

## 16 **Abstract**

17 Larval mosquitoes are aquatic omnivorous scavengers which scrape food from submerged  
18 surfaces and collect suspended food particles with their mouth brushes. The composition of  
19 diets that have been used in insectaries varies widely though necessarily provides sufficient  
20 nutrition to allow colonies to be maintained. Issues such as cost, availability and experience  
21 influence which diet is selected. One component of larval diets, essential fatty acids, appears to  
22 be necessary for normal flight though deficiencies may not be evident in laboratory cages and  
23 are likely more important when mosquitoes are reared for release into the field in e.g. mark-  
24 release-recapture and genetic control activities.

25 In this study, four diets were compared for rearing *Anopheles gambiae* and *Aedes aegypti*, all of  
26 which provide these essential fatty acids. Two diets were custom formulations specifically  
27 designed for mosquitoes (Damiens) and two were commercially available fish foods: Doctors  
28 Foster and Smith Koi Staple Diet and TetraMin Plus Flakes. Development rate, survival, dry  
29 weight and adult longevity of mosquitoes reared with these four diets were measured. The  
30 method of presentation of one diet, Koi pellets, was additionally fed in two forms, pellets or a  
31 slurry, to determine any effect of food presentation on survival and development rate.

32 While various criteria might be selected to choose 'the best' food, the readily-available Koi  
33 pellets resulted in development rates and adult longevity equal to the other diets, high survival  
34 to the adult stage and, additionally, this is available at low cost.

## 36 Introduction

37 Larval mosquitoes are omnivorous opportunistic aquatic feeders which collect and swallow  
38 small particles, can chew larger particles and can scrape food off of submerged surfaces [1].  
39 Laboratory culture of mosquitoes seldom attempts to replicate natural diets but usually consists  
40 of a readily available material that experience has proven to allow consistent rearing. These  
41 generally fall into two classes: simple mixtures of ingredients such as yeast and liver powder  
42 that are formulated by the users or commercial formulations of complex composition including  
43 foods such as fish-food flakes [2] or pellets [3], hog supplement [4], cereals and less commonly,  
44 maize pollen and algae [5]. Many unusual ingredients such as guinea pig feces and hay infusion  
45 are cited by Gerberg [6]. The diversity of 'successful' larval foods demonstrates that for many  
46 purposes, there are numerous choices.

47 Commercially manufactured diets provide the advantages that the researcher does not need to  
48 formulate the diet, can rely on the quality control measures employed by the manufacturer and  
49 often, ready availability. Some disadvantages of complex commercial foods are that the  
50 researcher has no control over the specific components of the diet which may change without  
51 notice and that obtaining the same diet locally in different countries may be difficult.

52 Considerations for choosing a food are simple: It must promote the routine rearing of good  
53 quality mosquitoes (however that is defined), be readily available, consistent in quality and  
54 preferably inexpensive. A less apparent and seldom considered advantage is to choose a diet  
55 that numerous laboratories can use to give some assurance of comparable results. If flight  
56 testing, mating assays or release activities will be performed, it is necessary to provide essential  
57 fatty acids [7].

58 This study determined, among four candidate larval diets for two frequently-reared disease  
59 vector mosquitos, *Anopheles gambiae* Giles (Diptera: Culicidae) and *Aedes aegypti* Linnaeus

60 (Diptera: Culicidae), which diet and feeding level resulted in the optimal performance for several  
61 important life history traits such immature growth rate, survival, size and adult longevity. One of  
62 these diets, TetraMin flakes, is widely used for both *Anopheles* and *Aedes spp.* We make a  
63 recommendation for selection among these diets which also considers cost and availability.

## 64 **Materials and Methods**

### 65 **Diet preparation**

66 Four diets were prepared for comparisons; two of these were custom formulations of a diet  
67 specifically designed for mosquitoes [8]. This diet consists of a 2:2:1 ratio (by weight) of bovine  
68 liver powder, tuna meal and Vanderzant vitamin mix. One formulation was prepared at CDC in  
69 Atlanta, GA using 'Now' brand liver powder (Bloomingdale, IL USA), tuna meal (AA Baits, Rock  
70 Ferry, Birkenhead, UK) and Vanderzant vitamin mix (Bio-Serv, Flemington, NJ, USA). Large  
71 particles were removed from the tuna meal and liver powder using a (600  $\mu$ ) standard sieve.  
72 Clumps of vitamin mix were broken up manually but no further sieving was done because the  
73 mix is soluble and the particle size allowed even mixing.

74 The other formulation of the Damiens diet was prepared by Frontier Scientific Services (Newark,  
75 DE USA) using defatted, desiccated liver powder (product no. 1320; Frontier Scientific  
76 Services), Vanderzant vitamin mix (product no. F8045, Frontier Scientific Services) and the  
77 same lot of tuna meal as was used at CDC. In order to ensure particle size was small enough  
78 for consumption by developing larvae, a milling and screening procedure was employed. A  
79 significant source of oversized particulates was the tuna meal. Most large particles were  
80 identified as scale and bone remnants from the manufacturers processing of the meal. The tuna  
81 meal was processed in a top-feeding hammer mill (The Fitzpatrick Co., Toronto, Canada) with a  
82 60-80 (177  $\mu$ ) mesh particle excluding screen. To ensure particles were milled to specification

83 without complete exclusion of meal components, the material was passed through the hammer-  
84 mill twice. The milled tuna meal was then mixed with the remaining ingredients in a bench-top  
85 'Kitchen Aid' bread mixer for 20 minutes. After mixing was complete, the final diet was hand  
86 sifted through a 60 mesh (177 $\mu$ ) screen to eliminate any remaining oversized particulates.

87 The other two diets were commercially available fish foods: Doctors Foster and Smith Koi  
88 Staple Diet (Rhineland, WI USA) and TetraMin Plus Flakes (Tetra GmbH, Melle, Germany).  
89 For fair comparison, both fish foods were ground to a similar size to the custom diets. Koi pellets  
90 were ground in a Miracle Model MR-300 Electric Grain and Flour Mill (Danbury, CT USA)  
91 followed by sieving in a 600  $\mu$  standard sieve and saving the particles that passed. The  
92 TetraMin was ground in a Black and Decker 'SmartGrind' coffee grinder (Beachwood, OH USA)  
93 after which it easily passed through a 600  $\mu$  sieve. These diet types will be identified as CDC,  
94 Frontier, Koi, and TetraMin respectively.

95 The ground diets were mixed at 0.4, 0.8, 1.6 and 3.2 % w/v in type II water and stored in ca. 13  
96 ml aliquots and frozen at -20°C where they remained until being thawed in warm water  
97 immediately before feedings. When 4 ml of the slurry was fed, these concentrations result in  
98 feeding rates (levels) of 8, 16, 32 and 64 mg diet / dish / day. Hereafter we will usually refer to  
99 the levels simply as e.g. 32 mg.

## 100 Mosquitoes

101 *Anopheles gambiae* mosquitoes were the 'G3' strain (MRA-112) obtained from the Malaria  
102 Research and Reference Resource Center (MR4, BEI Resources, Manassas VA USA). *Aedes*  
103 *aegypti* were the 'New Orleans' strain (NR-49160), also obtained from the MR4 and were in the  
104 F16-F18 generations during experiments. A standard rearing water was made of 0.3 g of pond  
105 salts (API, McLean, VA USA) per liter of type II purified water. *Anopheles gambiae* eggs were

106 collected, held overnight on damp filter paper and placed in trays on the day of hatching. *Aedes*  
107 *aegypti* eggs were hatched by placing egg papers in water under vacuum for 30 min. Hatching  
108 embryos of both species were placed in 500 ml of water containing 5 intact Koi pellets for one  
109 day before counting 80 larvae into 150 ml polystyrene Petri dishes (Item no. Z717231, Sigma-  
110 Aldrich, St. Louis, MO USA).

## 111 Trial design

112 An orthogonal design was used; three dishes (replicates) for each of the four diets at all four  
113 levels were established for both species. For these mosquitoes, it is not possible to determine  
114 sex at the first larval instar and it was assumed that random aliquots would deliver a  
115 representative sex ratio. Before counting larvae into Petri dishes, the empty dishes were  
116 weighed to a tenth of a gram on a triple-beam balance (700/800 Series, Ohaus, Parsippany, NJ  
117 USA) and labeled with their weight. On the day after hatching, 80 larvae were counted into the  
118 dishes and rearing water was added until the net weight was 96 g. Then 4 ml of food was added  
119 for an approximate total volume of 100 ml. The concentrations were selected to bracket a range  
120 shown to allow maximal survival and development rate with *Anopheles arabiensis* [9]. Additional  
121 diet was added on alternate days, prior to which the dishes were weighed and water was  
122 removed (ca. 2-3 ml), to return the net weight to 96 g before 4 ml of diet slurry was added to  
123 maintain an approximate total volume of 100 ml. Mosquitoes were reared in an environmental  
124 room set at 27°C and 70% relative humidity with a 12:12 light:dark cycle and 30 minutes of  
125 dawn and dusk.

126 In this main experiment, in which all diets and levels were tested, pupae were counted and  
127 collected daily, their sex determined and the pupae were then placed in individual plastic tubes  
128 for eclosion. Tubes were checked for adults daily with up to five randomly selected adults from  
129 each day of eclosion and sex being killed for dry weight measurements. Immature stage trials

130 were generally terminated when there were no more larvae present except as noted for the 8  
131 mg diet level with *An. gambiae* where observations of larval duration were terminated based on  
132 a pragmatic decision on days 12 and 14 (Table 1).

133 *Anopheles gambiae* and *Ae. aegypti* differ in many characteristics including body size and  
134 rearing tractability. Because of this, the two species have been analyzed separately. There are  
135 also known differences in outcomes by sex within species and, where appropriate, parameter  
136 estimates for each sex are calculated independently. Statistical analyses were performed using  
137 R version 3.5.1 “Feather Spray” [10]

#### 138 Inter-trial comparison of water temperature

139 Due to logistical limitations, it was not possible to perform all experiments concurrently. As a  
140 result, five sequential trials in the same chambers contributed to the experiment overall. The  
141 critical variable of water temperature was measured in three arbitrary dishes every two or three  
142 days in the morning using a Sper Scientific Model 800005 thermocouple thermometer  
143 (Scottsdale, AZ USA) equipped with a K type probe and overall means were compared using  
144 Analysis of Variance.

#### 145 Sex ratio

146 The sex of pupae arising from each treatment combination was observed and the ratio  
147 estimated. Chi-square tests were used to determine whether the male:female ratio varied with  
148 treatment or species.

#### 149 Survival to eclosion

150 To determine the effect of the different diets and levels fed on the number of adults that eclosed,  
151 Poisson-family generalized linear models (GLMs) using the diet level, diet type and their

152 interaction were fit to the data. Model simplification by deletion tests used F-tests to estimate  
153 influential effects as appropriate to the over-dispersion of these count data.

#### 154 Proportion of pupae eclosing

155 The data that were analyzed resulted from the counts of the number of pupae that formed and  
156 eclosion data. A weighted response variable that bound the number of pupae eclosing and the  
157 number of pupae that did not was created. Binomial-family GLMs using the dose, food type  
158 (both categorical, four levels) and their interactions were fit to these data. Model simplification  
159 by deletion used F-tests to estimate important effects as appropriate to the over-dispersion  
160 evident in the weighted proportion data.

#### 161 Larva developmental rate

162 The number of days taken to complete larval development to pupation was analyzed to  
163 determine effects on development rates. As the number of days to eclosion was an integer  
164 value, chi-squared tests were used to estimate the influence on this time of interactions between  
165 diet type and the amount of food provided as well as these as single effects. The relative  
166 contribution of each factor is then reflected in the test statistic values.

#### 167 Adult longevity estimation

168 The 32 mg diet level was chosen for assessing the influence of diet type on adult longevity  
169 based on observed rapid development rate and high survival across all diet types reported in  
170 the Results section. Pupae arising from these dishes were placed in aluminum-frame cages [11]  
171 which were covered with one or two layers (in the case of *Ae. aegypti*) of gauze and provided  
172 sugar water (10% w/v food grade sucrose, 0.1% w/v methylparaben in type II water) which was  
173 changed weekly. There were three cages for each diet, each associated with a different larval



174 replicate dish. All longevity measures were made concurrently. Mortality was usually checked  
175 daily, though occasionally it was not observed on Saturdays. Kaplan-Meier objects were created  
176 as response variables for the survival analyses and a Cox proportional hazards model was used  
177 to identify effects of diet type on survival for each species and sex.

### 178 Measures of dry weight

179 Dry weight of adults was determined for all diet types and levels. After eclosion, adults were  
180 transferred to glass scintillation vials, killed by freezing at -20°C and dried in a drying oven at  
181 60°C overnight after which they were removed and the caps sealed until weighing. For each  
182 diet/level combination, up to five individuals of each sex from each day of eclosion were  
183 weighed using a Sartorius SuperMicro S4 balance (Bohemia, NY USA) when that number was  
184 available. Weights are reported in micrograms.

185 The dry weight of mosquitos was a continuous response variable. As previously, diet type, level  
186 and mosquito sex were all considered as categorical factors. All main effects and interactions  
187 were tested by deletion from the maximal model. Effects that were either non-significant or  
188 accounted for less than 1% of the variation in the data were excluded.

### 189 The influence of pellet vs. slurry

190 One food type, the Koi pellets, was used to estimate any influence of the form of presentation  
191 and thus whether it is necessary to grind the food. Koi pellets were weighed on the SuperMicro  
192 balance and the average weight and standard deviation of pellets calculated; 52.0 mg (n=14,  
193 StDev 8.65). Two pellets (equivalent to 52 mg/dish/day) were fed on alternate days in parallel  
194 with the day the 32 mg slurry was given. Larval survival (the number of larvae reaching  
195 pupation) and larval duration (the number of days to pupation) were used as the measures for

196 this comparison. Pupae were collected daily in the morning and their sex determined. All dishes  
197 were new and there were three tests of each food form for both *Ae. aegypti* and *An. gambiae*.

## 198 **Results**

### 199 **Inter-trial comparability of water temperature**

200 The temperature was consistent among all trials of *Ae. aegypti* ( $F=1.03$ , d.f.= 2,72  $p=0.36$ ). The  
201 average water temperature was 26.9°C ( $n=75$ , StDev 0.45). The average temperature of all  
202 *An. gambiae* trials was 27.0°C ( $n=45$ , StDev 0.33) but there was a slight, but significant,  
203 variation in temperature between the trials ( $F=7.51$ , d.f.=1.43,  $p<0.01$ ); a trial during which Koi  
204 and TetraMin were being tested was on average 0.25 +/- 0.1 °C lower than one in which CDC  
205 and Frontier were being tested. This effect is, however, largely driven by a single day, day 7, in  
206 the CDC-Frontier trial which was warmer than other days ( $t=2.49$ , d.f.=14,  $p<0.05$ ).

### 207 **Sex ratio**

208 The proportion of *Ae. aegypti* pupae was observed to be consistently male-biased (0.59  
209 (95%CI: 0.57-0.60) relative to an assumption of equal proportions of males and females. In  
210 contrast, the overall ratio of male pupae in *An. gambiae* (0.47, 95%CI: 0.43-0.51) did not vary  
211 from equal proportions of either sex.

### 212 **Survival from hatch to eclosion**

213 In the *An. gambiae* 8 mg experiments, pupa formation was so prolonged and low that many  
214 larvae and pupae were discarded on day 12 or 14 of larval development, so interpretation of the  
215 results should take this into account (Table 1). Discarded pupae were not included in the  
216 analysis of likelihood to eclose.

**Table 1: The number of *An. gambiae* immatures discarded at the end of the trial at the lowest diet level, 8mg.**

| Diet type | Dish | Day | Discarded |
|-----------|------|-----|-----------|
| CDC       | A    | 14  | 47        |
|           | B    |     | 28        |
|           | C    |     | 48        |
| Frontier  | A    | 14  | 13        |
|           | B    |     | 7         |
|           | C    |     | 10        |
| Koi       | A    | 12  | 51        |
|           | B    |     | 52        |
|           | C    |     | 47        |
| TetraMin  | A    | 12  | 63        |
|           | B    |     | 66        |
|           | C    |     | 57        |

217

218 The responses of *Ae. aegypti* and *An. gambiae* to different diets and levels shared similarities in  
219 pattern but had marked differences in absolute level (Fig 1). *Aedes aegypti* eclosion varied less  
220 as a function of diet type and level and achieved higher numbers than did *An. gambiae* (for  
221 model null deviance see Table 2). There was an interaction between diet type and level on the  
222 number of *Ae. aegypti* males and females; this was largely driven by the two commercial foods,  
223 Koi and TetraMin, having higher numbers at the lowest diet level than did the CDC or Frontier  
224 diets.

225 **Fig 1. The number of *Ae. aegypti* and *An. gambiae* female and male adults observed by**  
226 **diet type and level.** The dashed horizontal line indicates the expected number of females and  
227 males assuming a 1:1 sex ratio and full survival. Error bars are the 95% CI of the mean.  
228 Darkening shades of color represent the increasing diet levels of 8, 16, 32 and 64 mg.

**Table 2. Statistical summary of the influences on the number of male and female adults formed with the proportion of the deviance explained (in parentheses) given as an indicator of effect size (significant effects indicated in bold).**

|                               | <i>Ae. aegypti</i>                           |                                              | <i>An. gambiae</i>                            |                                              |
|-------------------------------|----------------------------------------------|----------------------------------------------|-----------------------------------------------|----------------------------------------------|
|                               | Males                                        | Females                                      | Males                                         | Females                                      |
| Model null deviance (47 d.f.) | 86.77                                        | 201.09                                       | 689.35                                        | 669.89                                       |
| Diet:Level                    | <b>F=5.11, d.f.= 9,32, p&lt;0.001 (0.43)</b> | <b>F=12.53, d.f.= 9,32 p&lt;0.001 (0.55)</b> | <b>F=2.30, d.f.= 9,32, p=0.04 (0.10)</b>      | <b>F=2.82, d.f.= 9,32, p=0.015 (0.10)</b>    |
| Diet                          | F=0.18, d.f.= 3,41, p=0.91 (0.015)           | F=0.92, d.f.= 3,41, p=0.44 (0.04)            | F=2.67, d.f.= 3,41, p=0.06 (0.05)             | F=1.06, d.f.= 3,41, p=0.38 (0.02)            |
| Level                         | <b>F=5.69, d.f.= 3,44, p=0.002 (0.26)</b>    | <b>F=5.15, d.f.= 3,44, p=0.004 (0.28)</b>    | <b>F=28.70, d.f.= 3,44, p&lt;0.001 (0.64)</b> | <b>F=42.92, d.f.=3,44, p&lt;0.001 (0.70)</b> |

229

230 The *An. gambiae* pattern was the same for both males and females and there was a slight  
 231 interaction between diet type and the food level (this explained ca. 10% of the deviance in the  
 232 data for each sex) largely driven by the very low numbers forming from TetraMin at both the  
 233 lowest and highest dose. It must, however, be remembered that individuals were discarded  
 234 earlier in the experiment due to slow development at the lowest diet level for the TetraMin diet  
 235 (Table 1). The magnitude of the effect of diet level was much greater for *An. gambiae* than for  
 236 *Ae. aegypti* and, overall, few *An. gambiae* eclosed at both the lowest and highest diet level.

237 Proportion of pupae eclosing

238 We anticipated that the likelihood of pupae that had formed then successfully eclosing might be  
 239 affected by the food type or level. For both sexes of *Ae. aegypti* there was an interaction  
 240 between diet type and level on the number of pupae eclosing to adults (Table 3); this was  
 241 largely driven by poor eclosion at low levels of the Frontier diet (Fig 2). In all other cases, if the  
 242 larvae reached the pupa stage, they were highly likely to become an adult.

243 **Fig 2. Eclosion of pupae that formed by diet type and level.** Error bars represent the 95%  
 244 CI. Darkening shades of color represent the increasing diet levels of 8, 16, 32 and 64 mg.

**Table 3. Model summary statistics estimating the influence of diet type and level on the number of male and female pupae eclosing to adults with the effect size (proportion of the deviance explained) indicated in parentheses (significant effects in bold).**

|                     | <i>Ae. aegypti</i>                         |                                          | <i>An. gambiae</i>                       |                                          |
|---------------------|--------------------------------------------|------------------------------------------|------------------------------------------|------------------------------------------|
|                     | Males                                      | Females                                  | Males                                    | Females                                  |
| Model null deviance | 165.10                                     | 155.63                                   | 207.64                                   | 96.12                                    |
| Diet:Level          | <b>F=3.33, d.f.=9,32, p = 0.006 (0.35)</b> | <b>F=3.19, d.f.=9,32, p=0.007 (0.33)</b> | F=1.76, d.f.=8,25, p=0.14 (0.14)         | F=1.15, d.f.=8,26, p=0.37 (0.14)         |
| Diet                | F=1.14, d.f.=3,41, p=0.35 (0.07)           | F=1.43, d.f.=3,41, p=0.25, (0.08)        | <b>F=4.31, d.f.=3,33, p=0.011 (0.16)</b> | <b>F=4.53, d.f.=3,34, p=0.009 (0.19)</b> |

|       |                                     |                                     |                                                                  |                                                                  |
|-------|-------------------------------------|-------------------------------------|------------------------------------------------------------------|------------------------------------------------------------------|
| Level | F=2.24 d.f.=3,41,<br>p=0.10, (0.13) | F=2.51, d.f.=3,41,<br>p=0.07 (0.14) | <b>F=10.10,</b><br><b>d.f.=3,33,</b><br><b>p&lt;0.001 (0.36)</b> | <b>F=9.03, d.f.=</b><br><b>3,35, p&lt;0.001</b><br><b>(0.21)</b> |
|-------|-------------------------------------|-------------------------------------|------------------------------------------------------------------|------------------------------------------------------------------|

245

246 For *An. gambiae*, the pattern was similar for both sexes. Pupae that resulted from feeding on  
 247 the Koi diet were most likely to eclose regardless of diet level (Fig 2), though generally the  
 248 eclosion rate was highest at the intermediate diet levels than it was at either the highest or  
 249 lowest levels (Table 3).

250 The magnitude of the treatment effects was much greater for *An. gambiae* than for *Ae. aegypti*  
 251 (Table 3) with, overall, the *An. gambiae* being more sensitive to the type and level of the diet  
 252 provided (Fig 2). The response of *Ae. aegypti* was more nuanced with only the interaction  
 253 between diet and level being significant.

## 254 Immature development

255 For both species and sexes the pattern is similar. The time taken to complete the larval stage is  
 256 an interaction of both the food type and the level ( $p < 0.05$  in all cases; Table 4, Fig 3). The effect  
 257 of diet level is consistently much greater than variation observed among diet types.

258 **Fig 3. Day of eclosion.** The panels are, left to right, *Ae. aegypti* females, males, *An. gambiae*  
 259 females, males. The dark line indicates the median day of eclosion for each condition. The  
 260 boxes contain the two central quartiles and the whiskers contain the outer quartiles unless  
 261 outliers are present. These are indicated by points. Darker shades of color indicate increasing  
 262 diet levels, 8, 16, 32 and 64 mg; CDC, green; Frontier, blue, Koi, brown and TetraMin, red.

**Table 4. Development Rate Statistics**

|                 | <i>Ae. aegypti</i>   |                      | <i>An. gambiae</i>   |                      |
|-----------------|----------------------|----------------------|----------------------|----------------------|
|                 | Females              | Males                | Females              | Males                |
| Interaction     | $\chi^2 = 37.46,$    | $\chi^2 = 26.31,$    | $\chi^2 = 19.28,$    | $\chi^2 = 19.19,$    |
| Diet type:Level | df = 9,<br>p < 0.001 | df = 9,<br>p < 0.002 | df = 8,<br>p < 0.05  | df = 6,<br>p < 0.01  |
| Diet type       | $\chi^2 = 12.77,$    | $\chi^2 = 25.63,$    | $\chi^2 = 17.15,$    | $\chi^2 = 23.35,$    |
|                 | df = 3,<br>p < 0.01  | df = 3,<br>p < 0.001 | df = 3,<br>p < 0.001 | df = 3,<br>p < 0.001 |
| Level           | $\chi^2 = 150.61,$   | $\chi^2 = 180.26,$   | $\chi^2 = 77.55,$    | $\chi^2 = 54.76,$    |
|                 | df = 3,<br>p < 0.001 | df = 3,<br>p < 0.001 | df = 3,<br>p < 0.001 | df = 3,<br>p < 0.001 |

263

264 *Anopheles gambiae* is the more sensitive species to diet level, but the estimates of time taken  
 265 were based on many fewer measures than were possible for *Ae. aegypti* because of the low  
 266 number of pupae at low and high doses. No estimates of larval duration were possible for  
 267 *An. gambiae* in four of the combinations as none developed successfully. Generally,  
 268 development times for *An. gambiae* were more consistent with Frontier, though there were few  
 269 developing at low and high doses.

## 270 Longevity of adults from 32 mg diet level larvae

271 The cage from which the individual mosquitoes came was included in each model to account for  
 272 any cage-effects; in no case were these identified to account for significant variation in the data  
 273 ( $p > 0.05$  in all cases). Overall, the median adult lifespan of *Aedes aegypti* males and females  
 274 was similar (Table 5). For females, there was no identifiable variation in longevity as a function

275 of diet type ( $\chi^2=4.45$ , d.f.=3,  $p=0.22$ ). There was variation in male longevity but CDC and Koi  
276 led to longer-lived males ( $\chi^2=12.20$ , d.f.=3,  $p=0.007$ ).

277

**Table 5. Adult Longevity**

*Ae. aegypti*

| Diet     | Females |                 | Males |                 |
|----------|---------|-----------------|-------|-----------------|
|          | n       | Median (95% CI) | n     | Median (95% CI) |
| CDC      | 55      | 51 (46-67)      | 80    | 59 (56-67)      |
| Frontier | 52      | 49 (35-67)      | 90    | 54 (51-61)      |
| Koi      | 58      | 57 (53-63)      | 82    | 60 (57-63)      |
| TetraMin | 69      | 50 (31-68)      | 80    | 49 (44-53)      |

*An. gambiae*

| Diet     | Females |                 | Males |                 |
|----------|---------|-----------------|-------|-----------------|
|          | n       | Median (95% CI) | n     | Median (95% CI) |
| CDC      | 47      | 37 (25-39)      | 55    | 21 (14-26)      |
| Frontier | 57      | 32 (29-37)      | 62    | 29 (27-32)      |
| Koi      | 53      | 37 (37-37)      | 48    | 20 (15-30)      |
| TetraMin | 66      | 30 (26-37)      | 56    | 24 (18-29)      |

278 *Anopheles gambiae* females lived consistently longer than males (Table 5). For females, diet  
279 type affected longevity with CDC and Koi leading to longer life ( $\chi^2=9.87$ , d.f.=3,  $p=0.02$ ). There  
280 was greater variation in male longevity but no diet-related variation was identified ( $\chi^2=5.80$ ,  
281 d.f.=3,  $p=0.12$ ).

282



## 283 Dry weight

### 284 *Aedes aegypti* dry weight

285 A total of 787 *Ae. aegypti* females and 880 males were weighed. *Aedes aegypti* males weigh  
286 less than females ( $p < 0.001$ ) – slightly more than half as much at any specific diet level. Across  
287 all diets, the ratio of male to female weight varied only slightly ranging from 0.56-0.58:1. Males  
288 were less responsive to increasing food quantity than females (Table 6, Fig 4). Though there  
289 was a small effect of diet type, the greatest effect for both sexes was that of diet level, which  
290 accounted for almost 50 times the variation than that found between diet brands.

291 **Fig 4. Adult dry weights.** (a) *Aedes aegypti* females and (b) males. Darker shades of color  
292 indicate increasing diet levels of 8, 16, 32 and 64 mg. Error bars are 95% confidence intervals of  
293 the mean.

**Table 6. *Aedes aegypti* weight statistics with significant effects shown in bold.**

|                                | F            | d.f.           | p                | R <sup>2</sup> |
|--------------------------------|--------------|----------------|------------------|----------------|
| <b>Full model</b>              | <b>86.87</b> | <b>69,1597</b> | <b>&lt;0.001</b> | <b>0.79</b>    |
| Sex:Diet:Level                 |              |                | 0.52             | 0.00           |
| Sex:Diet                       |              |                | 0.14             | 0.00           |
| Level:Diet                     |              |                | 0.12             | 0.00           |
| <b>Minimal adequate model</b>  | <b>88.88</b> | <b>10,1656</b> | <b>&lt;0.001</b> | <b>0.78</b>    |
| <b>Sex:Level (interaction)</b> | <b>75.94</b> | <b>3,1656</b>  | <b>&lt;0.001</b> | <b>0.02</b>    |
| <b>Diet (factor)</b>           | <b>21.96</b> | <b>3,1656</b>  | <b>&lt;0.001</b> | <b>0.01</b>    |

|                               |                |               |                  |             |
|-------------------------------|----------------|---------------|------------------|-------------|
| <b>Sex (factor)</b>           | <b>1770.50</b> | <b>1,1659</b> | <b>&lt;0.001</b> | <b>0.30</b> |
| <b>Feeding Level (factor)</b> | <b>909.51</b>  | <b>1,1659</b> | <b>&lt;0.001</b> | <b>0.45</b> |

294

295 *Anopheles gambiae* dry weight

296 A total of 208 *An. gambiae* females and 189 males were weighed. *Anopheles gambiae* males  
 297 are lighter than females ( $p < 0.001$ ), but there was no difference in the way that they respond to  
 298 the feeding regimes (all interaction terms  $> 0.05$ ). Feeding level had the strongest effect on  
 299 adult weight, though food type was slightly influential; the mosquitoes responded differently to  
 300 food level as a function of diet. The highest level of Frontier led to smaller mosquitoes, which  
 301 was not the case for other diets. TetraMin gave low survival at highest and lowest doses and  
 302 evaluations of adult mass were not possible there (Table 7, Fig 5).

303 **Fig 5. *Anopheles gambiae* dry weights.** (a) *Anopheles gambiae* females and (b) males.  
 304 Darker shades of color indicate increasing diet levels of 8, 16, 32 and 64 mg. Error bars are  
 305 95% confidence intervals of the mean.

306

**Table 7. *Anopheles gambiae* weight statistics with significant effects shown in bold font.**

|                   | F            | d.f.          | p                | R <sup>2</sup> |
|-------------------|--------------|---------------|------------------|----------------|
| <b>Full model</b> | <b>11.03</b> | <b>54,731</b> | <b>&lt;0.001</b> | <b>0.45</b>    |
| Sex:Diet:Level    |              |               | 0.91             | 0.00           |
| Sex:Diet          |              |               | 0.41             | 0.00           |

|                               |               |               |                  |             |
|-------------------------------|---------------|---------------|------------------|-------------|
| Sex:Level                     |               |               | 0.58             | 0.00        |
| <b>Minimal adequate model</b> | <b>35.78</b>  | <b>15,770</b> | <b>&lt;0.001</b> | <b>0.41</b> |
| <b>Level:Diet</b>             | <b>7.93</b>   | <b>8,778</b>  | <b>&lt;0.001</b> | <b>0.05</b> |
| <b>Diet (factor)</b>          | <b>16.70</b>  | <b>3,778</b>  | <b>&lt;0.001</b> | <b>0.09</b> |
| <b>Sex (factor)</b>           | <b>80.93</b>  | <b>1,778</b>  | <b>&lt;0.001</b> | <b>0.11</b> |
| <b>Feeding Level (factor)</b> | <b>909.51</b> | <b>3,778</b>  | <b>&lt;0.001</b> | <b>0.33</b> |

307

308 Food presentation: the influence of pellet vs. slurry on larval survival and  
 309 development rate

310 The form in which Koi diet was fed had no effect on the number of pupae that formed in either  
 311 species (Table 8).

**Table 8. Survival and development with significant effects shown in bold font.**

|                 | <i>Ae. aegypti</i> |          |                  |          |     |      | <i>An. gambiae</i> |          |                 |          |     |      |
|-----------------|--------------------|----------|------------------|----------|-----|------|--------------------|----------|-----------------|----------|-----|------|
|                 | Female             |          |                  | Male     |     |      | Female             |          |                 | Male     |     |      |
|                 | $\chi^2$           | d.f      | p                | $\chi^2$ | d.f | p    | $\chi^2$           | d.f      | p               | $\chi^2$ | d.f | p    |
| Number of pupae | 1.23               | 1        | 0.27             | 0.05     | 1   | 0.82 | 0.78               | 1        | 0.38            | 2.33     | 1   | 0.13 |
| Larval duration | <b>12.68</b>       | <b>1</b> | <b>&lt;0.001</b> | 2.43     | 1   | 0.12 | <b>6.5</b>         | <b>1</b> | <b>&lt;0.05</b> | 0.01     | 1   | 0.92 |

312

313 The form in which the Koi diet was provided to larvae had no effect on the development rate of  
 314 male larvae from hatch to pupation of either species (Table 8). However, the development of

315 female larvae fed pellets delayed pupation by a day (median values: *Ae. aegypti* 7:6,  
316 *An. gambiae* 9:8 pellet vs. slurry respectively).

## 317 **Discussion**

318 In this diet comparison, a range of diets fed at rates ranging from very low to high was  
319 compared. This experimental design was chosen to reduce the likelihood that the variation in  
320 the proportion of any particular component of diet (protein, fat or carbohydrates) might result in  
321 outcomes that do not represent the most favorable levels of diet fed. Because the ratios of  
322 protein, carbohydrates and fats differ among diets, a wide-level design is agnostic regarding  
323 which is most important for the outcomes tested. This approach is in contrast to Linenberg [3] in  
324 which the combined weight of fat and protein – to the exclusion of carbohydrates - was used to  
325 determine the amounts of diet provided to larvae for comparisons.

326 The reputation of *Ae. aegypti* as a robust and physiologically plastic laboratory model for  
327 laboratory study was borne out by the high eclosion rates at all diet levels compared to  
328 *An. gambiae* which was very sensitive to level. This trait also makes it a relatively insensitive  
329 choice with which to compare diets.

330 These results demonstrated that as far as choosing a diet, TetraMin is the least desirable for  
331 *An. gambiae* because of the sensitivity to diet level that was required for adult production;  
332 neither the highest nor lowest doses resulted in adults within what we considered a practical  
333 time period. Linenberg et al. [3] also observed that two pellet fish foods performed better than  
334 TetraMin flakes though it is not clear whether the specific product was the same as the one we  
335 tested.

336 We were surprised that two different formulations of the Damiens diet prepared by CDC and  
337 Frontier Scientific Services gave measurably different results. There are two differences which

338 might have contributed. Frontier used defatted liver powder whereas the CDC source did not  
 339 specify whether it was defatted or not. Secondly, the Frontier team had access to a hammer mill  
 340 which permitted the tuna meal to be ground more finely – likely contributing a larger amount of  
 341 indigestible scale and bone to the final formulation of diet resulting in lower concentrations of  
 342 other tuna parts. The CDC team discarded the larger particles. These two differences may have  
 343 resulted in a formulation with substantially different nutritional content on a weight basis.

344 Of the diets tested, one can make an evaluation of their performance assuming, somewhat  
 345 subjectively, that maximal survival rates, longevity and size along with short development times  
 346 are desirable outcomes (Table 9).

Table 9. A semi-subjective assessment of the salient biological outcomes measured as an assessment of laboratory use of the four diets tested (advantageous characteristics are highlighted in green, neutral ones in gray and disadvantageous ones in yellow.)

|                                     | <i>Ae. aegypti</i>     |                       |     |          | <i>An. gambiae</i> |          |         |          |
|-------------------------------------|------------------------|-----------------------|-----|----------|--------------------|----------|---------|----------|
|                                     | CDC                    | Frontier              | Koi | TetraMin | CDC                | Frontier | Koi     | TetraMin |
| Survival to eclosion                | No effect of diet type |                       |     |          |                    |          | Highest |          |
| Probability of pupae to eclose      | No effect of diet type |                       |     |          |                    |          | Highest |          |
| Eclosion sensitivity to diet levels |                        | fewer adults eclosing |     |          |                    |          | Lowest  |          |

|                  |                            |                 |             |  |                             |                 |               |  |
|------------------|----------------------------|-----------------|-------------|--|-----------------------------|-----------------|---------------|--|
|                  |                            | at lowest level |             |  |                             |                 |               |  |
| Development rate | Little difference observed |                 |             |  |                             | More consistent |               |  |
| Dry weight       | Little difference observed |                 |             |  | Little consistent advantage |                 |               |  |
| Adult longevity  | > for males                |                 | > for males |  | > for females               |                 | > for females |  |

347

348 The deviation from a 1:1 ratio of females and males that we observed in the New Orleans strain  
 349 of *Ae. aegypti* is common among many strains of *Ae. aegypti* [12]. In contrast, the authors are  
 350 unaware of any natural strains of *An. gambiae* that demonstrate sex ratio bias although this has  
 351 been observed among progeny of crosses between different species of the *An. gambiae*  
 352 complex [13].

353 One diet, Koi, was tested to determine whether the method of presentation of the same diet had  
 354 an effect on the development rate and survival to the pupa stage. Of the other diets that could  
 355 be fed in either a whole or ground form, only TetraMin is originally in a flake form and similar  
 356 comparisons are possible. Any of the powders or flakes can be fed either as powder sprinkled  
 357 on the surface, a practice which is consistent with the 'surface feeding' behavior of *Anopheles*  
 358 *spp.* [1].

359 The authors are aware that some laboratories provide the diet as intact pellets or flakes rather  
 360 than as a slurry. The difference between the total weights of food in our analysis confounds our  
 361 analysis and arguably, if one provided more pellets, the development rates of females would be  
 362 the same as when fed slurry. But as far as these analyses can be interpreted, one can conclude  
 363 that for a given amount of food, increasing the availability in a ground form will increase the

364 development rate. Feeding as a slurry also allows a continuously variable (rather than discrete)  
365 amount of food to be delivered though this advantage requires mixing and pipetting slurry vs.  
366 simply counting pellets.

367 Our results demonstrate that although the *An. gambiae* feeding rate in mosquito publications on  
368 is often described as '*ad libitum*', it is almost certain this is not the case. The levels of diet that  
369 result in the largest size cause so much mortality that they would not be used. Expressing it  
370 another way, larvae will continue eating more food at levels that are not consistent with overall  
371 survival of mosquitoes for experiments. In most experiments, the amount of food that is made  
372 available always restricts growth below the maximal size possible under true *ad libitum*  
373 conditions.

374 We consider all of the diets tested acceptable in our hands. However, the superior performance  
375 and low cost of the Koi food makes it a good choice for most purposes. It can be fed either as a  
376 slurry or pellet and is available in large amounts which can be frozen to stockpile the food for  
377 future use, a practice that would permit only occasional importation.

378

## 379 **Acknowledgments**

380 We appreciate the custom Damiens diet formulation that was generously prepared by MV and  
381 KG at Frontier Scientific Services and supplied to the CDC with the understanding that the  
382 experimental design and diet comparisons would not be influenced by the potential for  
383 commercialization. Frontier kindly formulated the diet and provided it without charge for these  
384 comparisons.

385 The following reagents were obtained through the NIH Biodefense and Emerging Infections  
386 Research Resources Repository, NIAID, NIH: *An. gambiae*, strain 'G3' (MRA-112) and *Ae.*  
387 *aegypti* 'New Orleans' strain (NR-49160).

388 The findings and conclusions in this report are those of the authors and do not necessarily  
389 represent the official position of the Centers for Disease Control and Prevention.

390 Funded by Target Malaria, a project that receives core funding from the Bill & Melinda  
391 Gates Foundation and from the Open Philanthropy Project Fund, an advised fund of Silicon  
392 Valley Community Foundation.

393

394



## 395 **References Cited**

- 396 1. Clements AN. The biology of mosquitoes. Volume 1: development, nutrition and  
397 reproduction. CABI;1992.
- 398 2. Carvalho DO, Nimmo D, Naish N, McKemey AR, Gray P, Wilke, ABB, et al. Mass  
399 Production of Genetically Modified *Aedes aegypti* for Field Releases in Brazil. *J*  
400 *Visualized Exps.* 2013; (), e3579.
- 401 3. Linenberg I, Christophides GK, Gendrin M. Larval diet affects mosquito development and  
402 permissiveness to *Plasmodium* infection. *Sci Rep.* 2016;6(1):38230–10.
- 403 4. Dame DA, Haile DG, Lofgren CS, Bailey DL, Munroe WL. Improved rearing techniques  
404 for larval *Anopheles albimanus*: use of dried mosquito eggs and electric heating tapes.  
405 *Mosquito News.* 1978;38(1):68–74.
- 406 5. Kivuyo HS, Mbazi PH, Kisika DS, Munga S, Rumisha SF, Urasa FM, et al. Performance  
407 of Five Food Regimes on *Anopheles gambiae sensu stricto* Larval Rearing to Adult  
408 Emergence in Insectary. *PLoS ONE.* 2014;9(10):e110671.
- 409 6. Gerberg EJ. Manual for mosquito rearing and experimental techniques. *Am Mosquito*  
410 *Control Assoc Bull.* 1979;5:1–124.
- 411 7. R DH, Kleinjan JE, Asman SM. Eicosapentanoic Acid in Mosquito Tissues: Differences  
412 Between Wild and Laboratory-Reared Adults. *Environ Entomol.* 1988;17(2):172–80.
- 413 8. Damiens DD, Benedict MQ, Wille M, Gilles JRL. An Inexpensive and Effective Larval Diet  
414 for *Anopheles arabiensis* (Diptera: Culicidae): Eat Like a Horse, a Bird, or a Fish? *J Med*  
415 *Entomol.* 2012;49(5):1001–11.

- 416 9. Gilles JRL, Lees RS, Soliban SM, Benedict MQ. Density-dependent effects in  
417 experimental larval populations of *Anopheles arabiensis* (Diptera: Culicidae) can be  
418 negative, neutral, or overcompensatory depending on density and diet levels. J Med  
419 Entomol. 2011;48(2):296–304.
- 420 10. R Core Team (2018). R: A language and environment for statistical computing. R  
421 Foundation for Statistical Computing, Vienna, Austria. URL <https://www.R-project.org/>
- 422 11. Savage KE, Lowe RE. A one-piece aluminum cage designed for adult mosquitoes.  
423 Mosquito News. 1971;31(1):111–2.
- 424 12. Hickey WA, Craig GB. Genetic distortion of sex ratio in a mosquito, *Aedes aegypti*.  
425 Genetics. 1966;53(6):1177–96.
- 426 13. Davidson G. *Anopheles gambiae*, a complex of species. Bull WHO. 1964;31:625–34.

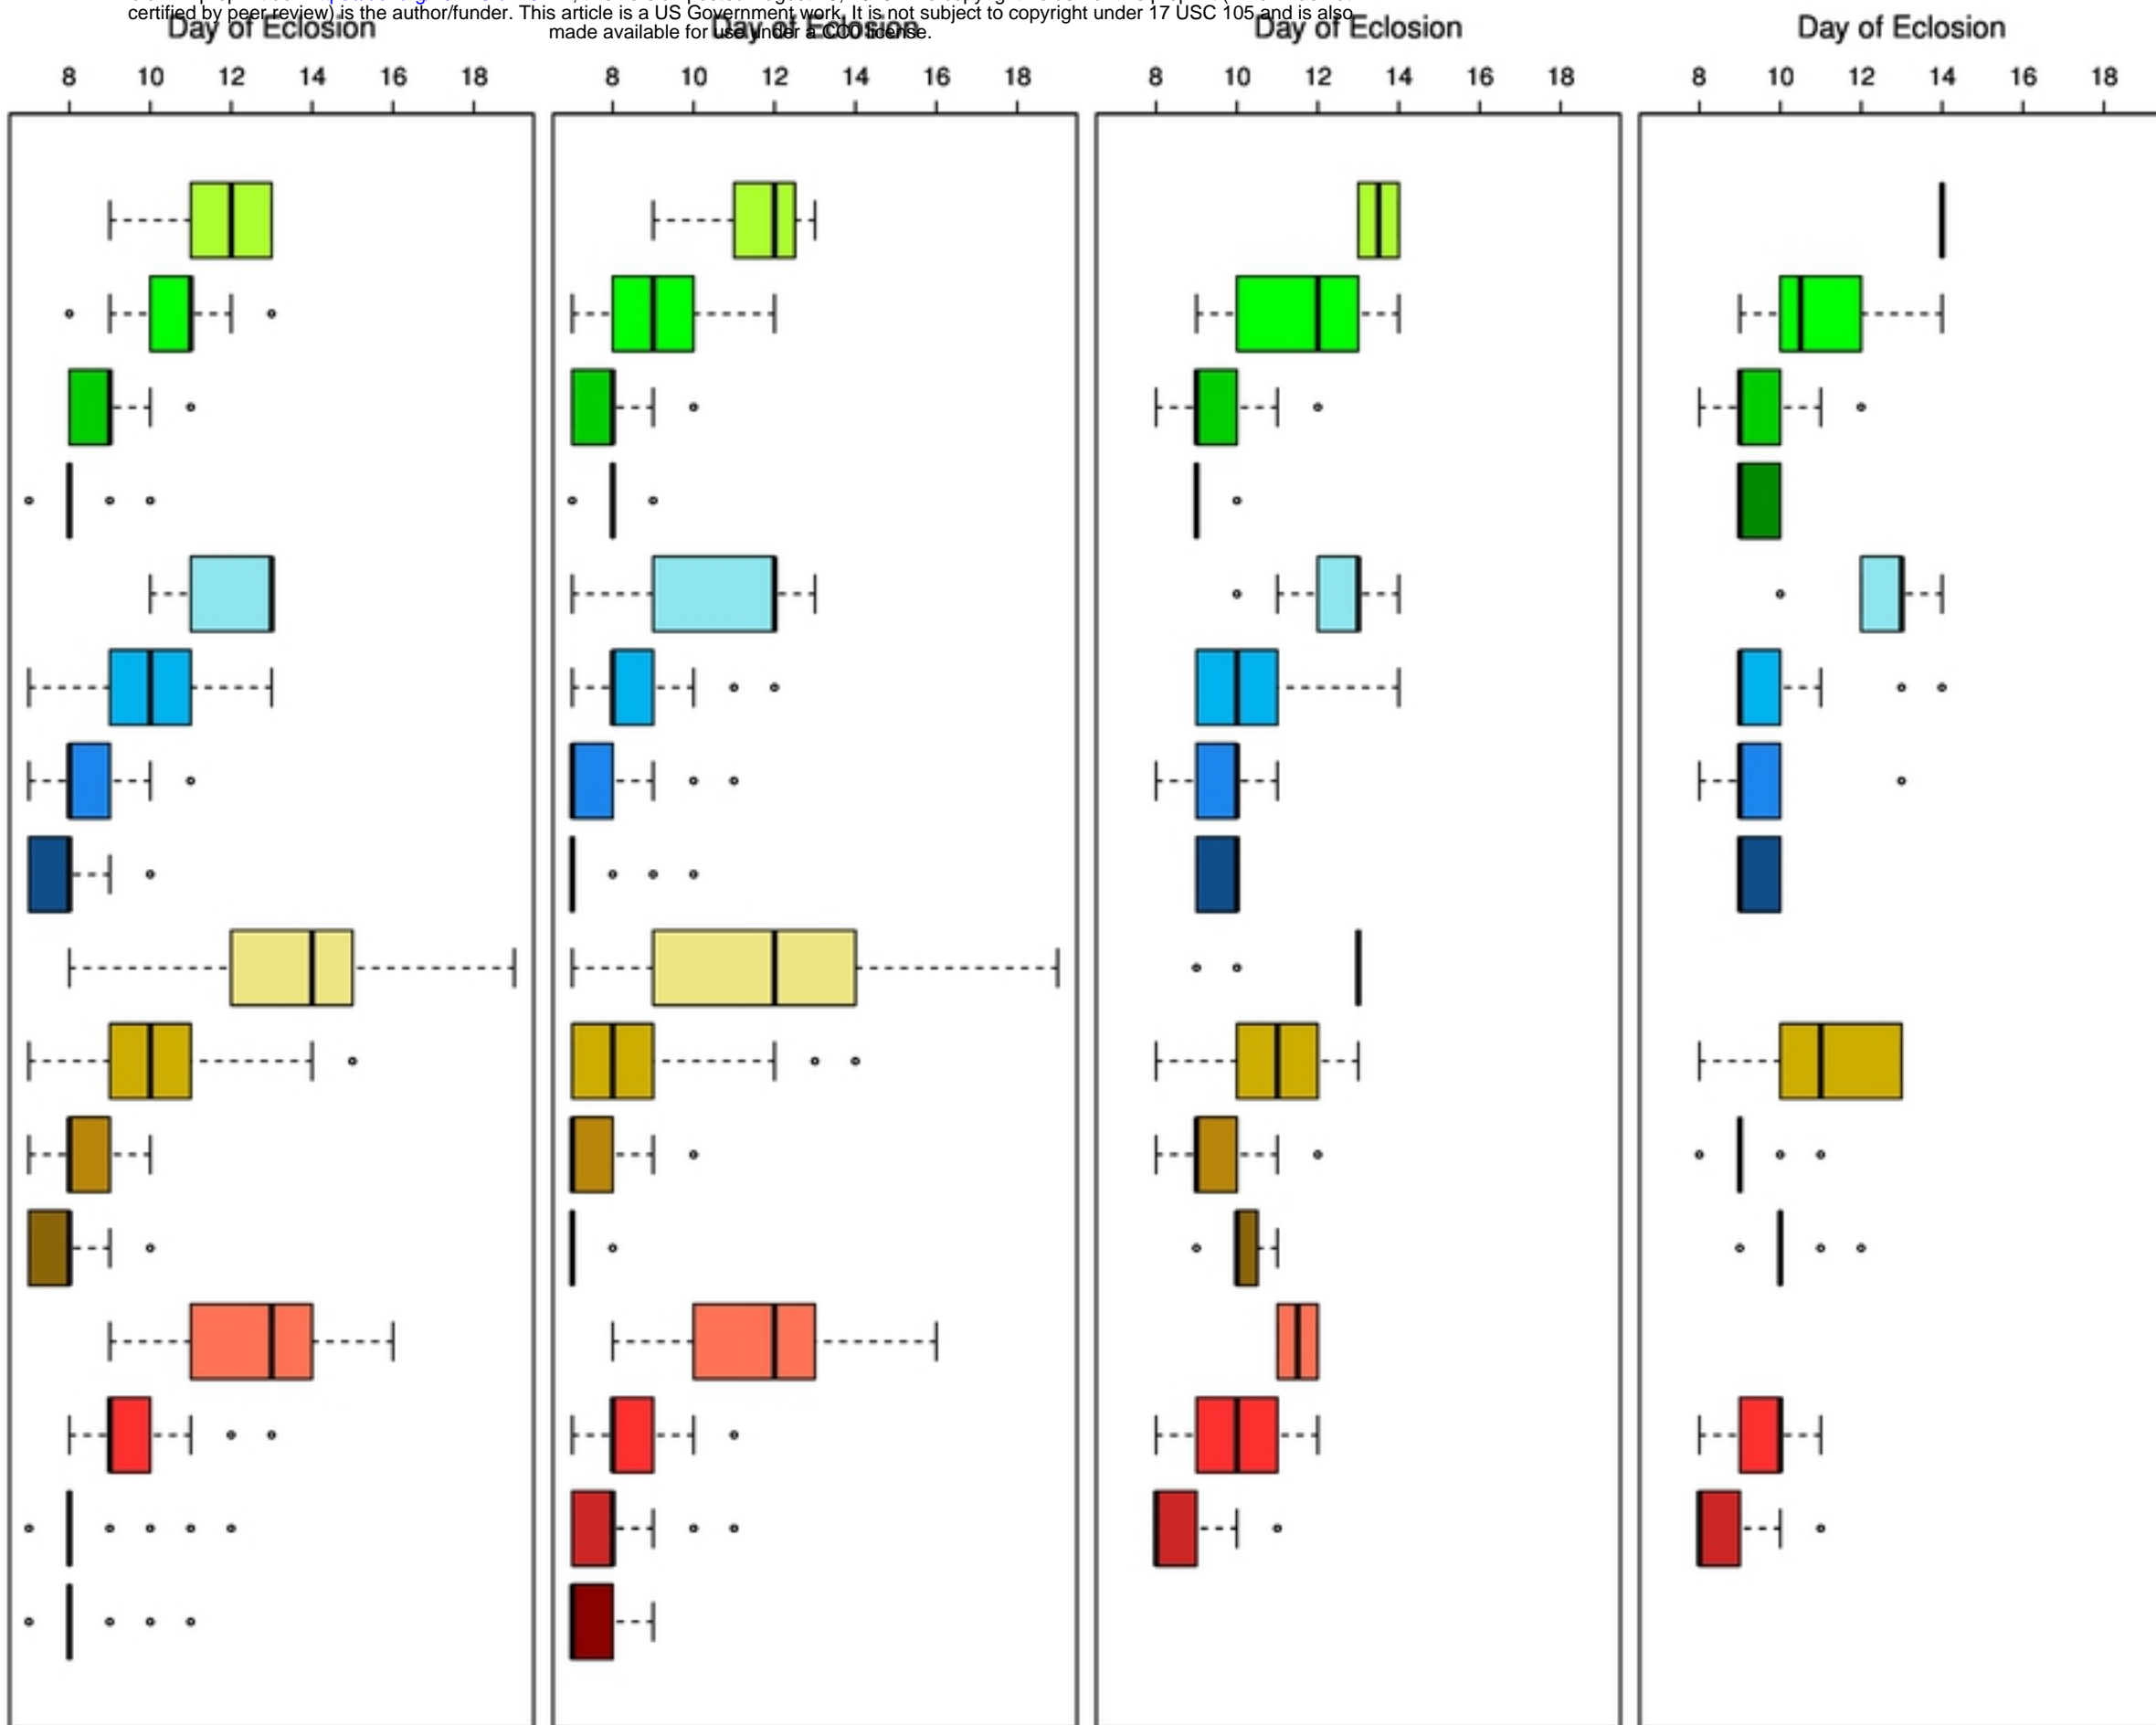

Figure 3

*Ae. aegypti* females

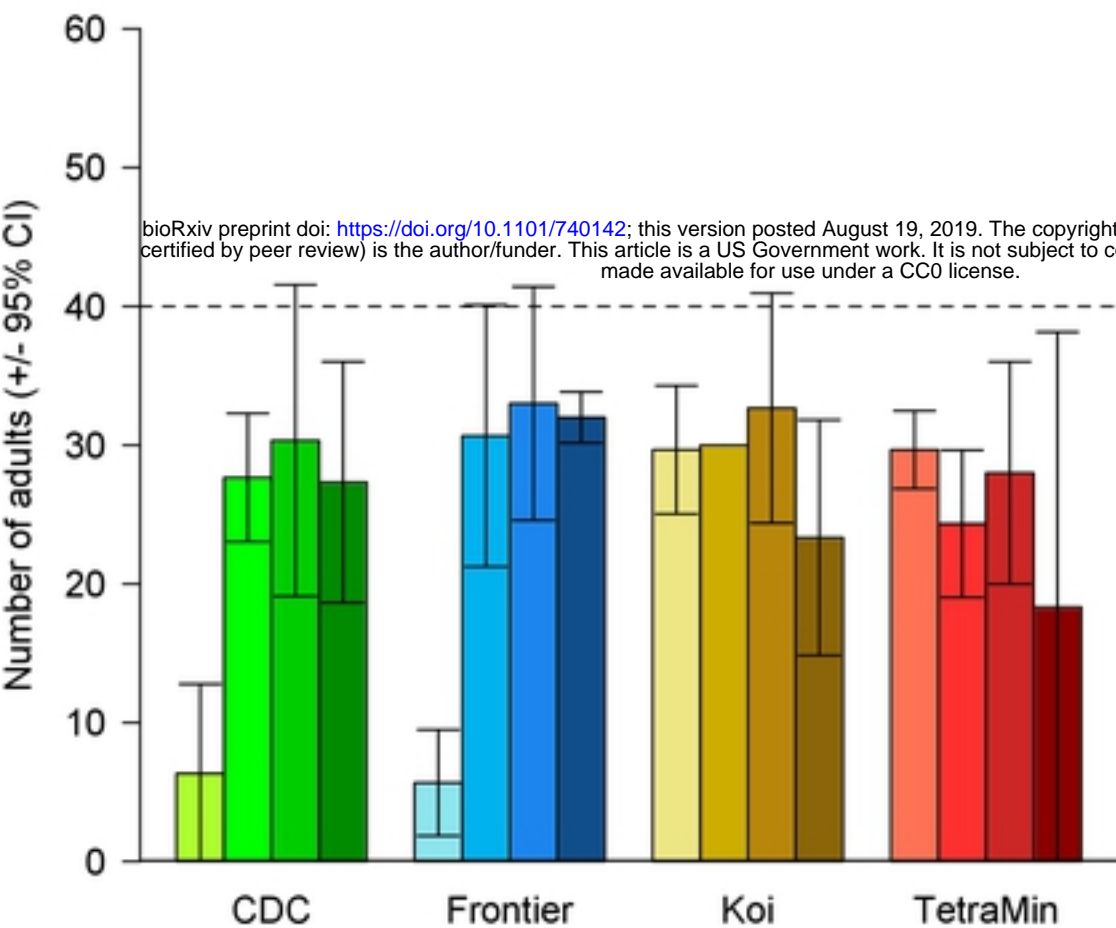

*Ae. aegypti* males

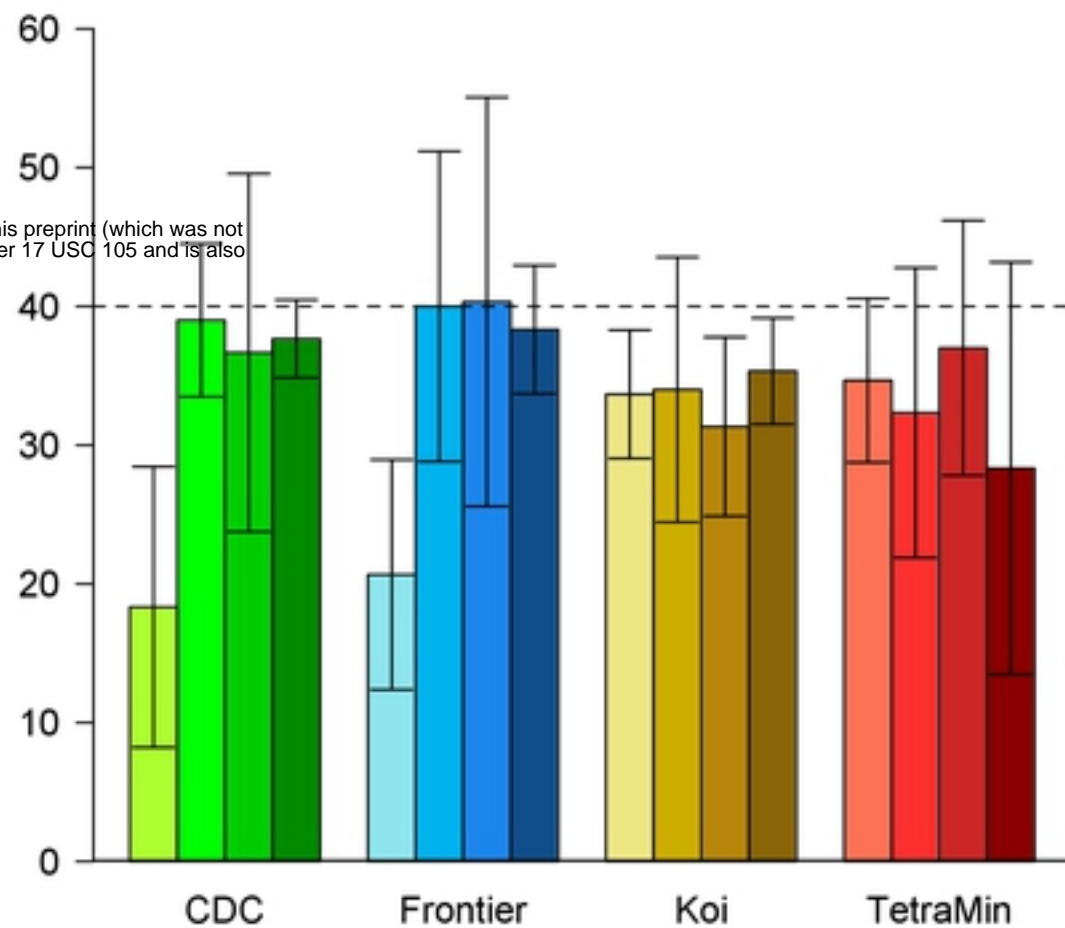

*An. gambiae* females

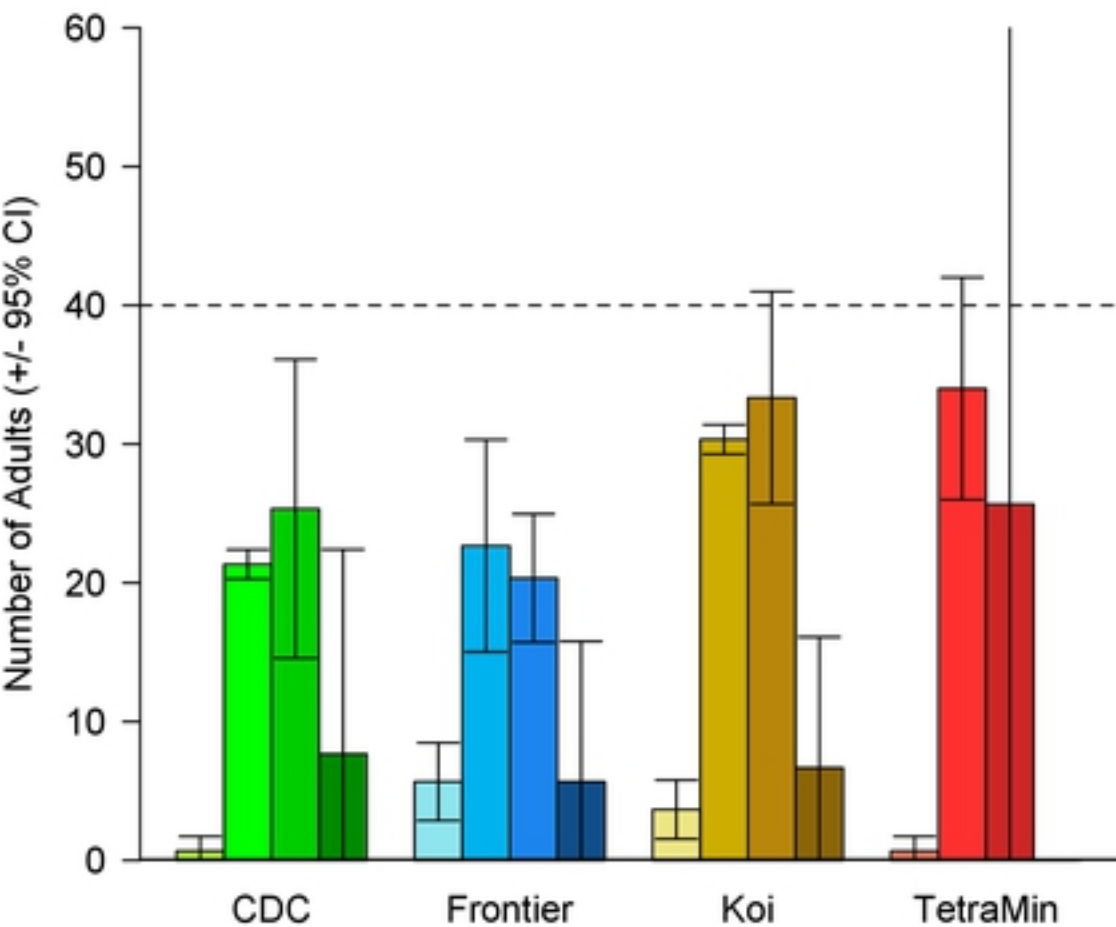

*An. gambiae* males

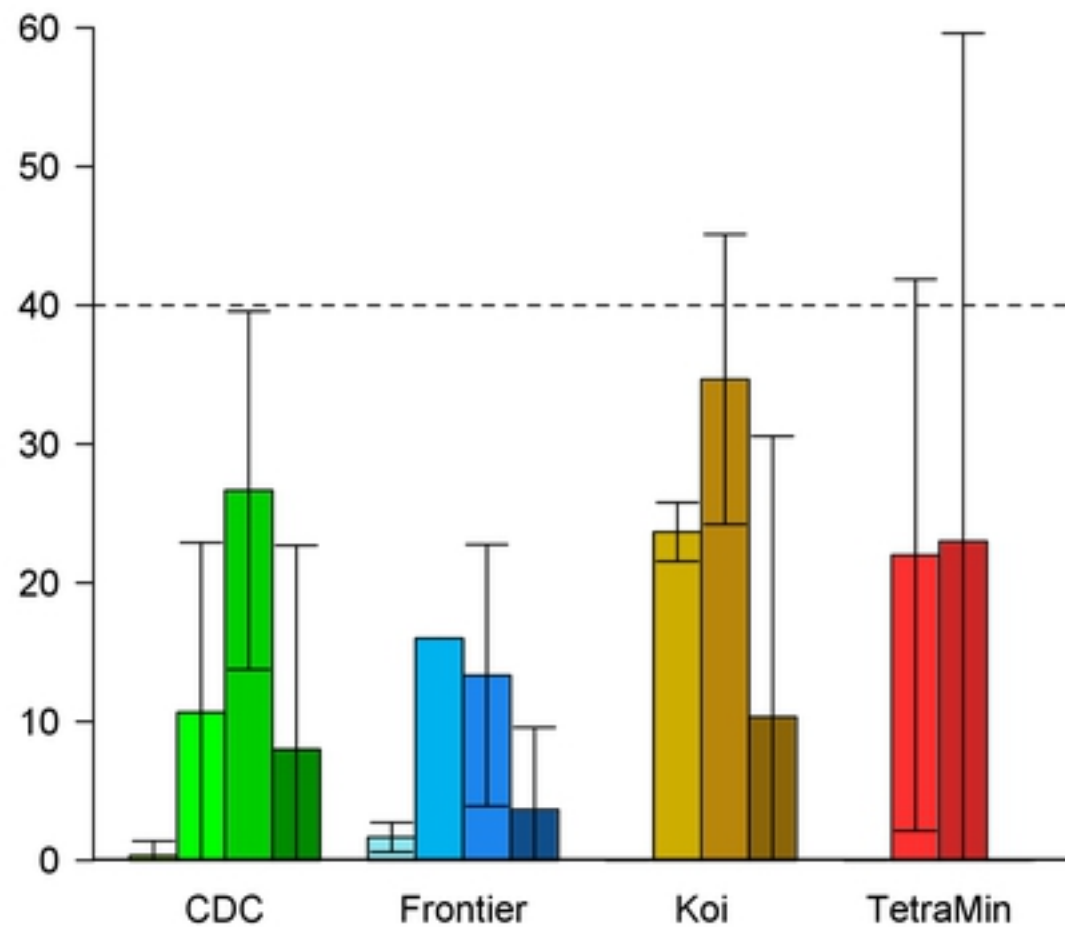

Figure 1

*Ae. aegypti* females

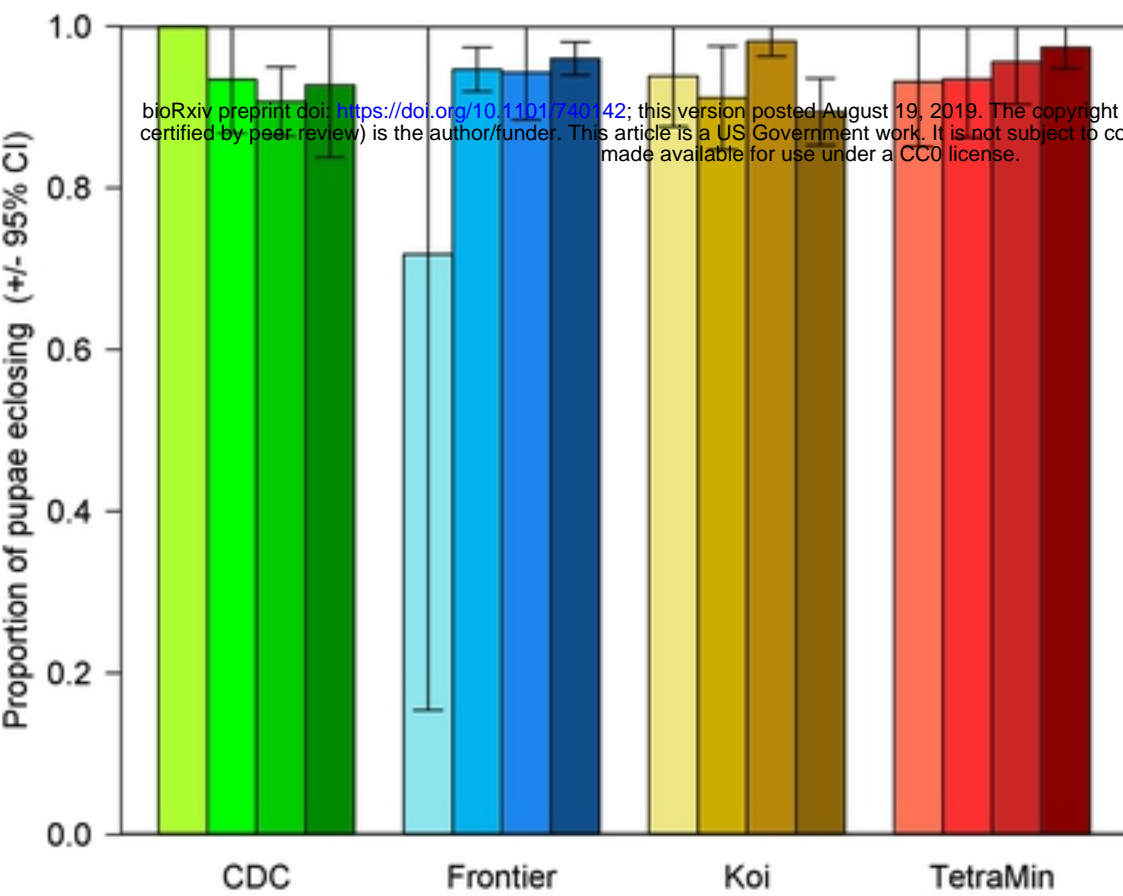

*Ae. aegypti* males

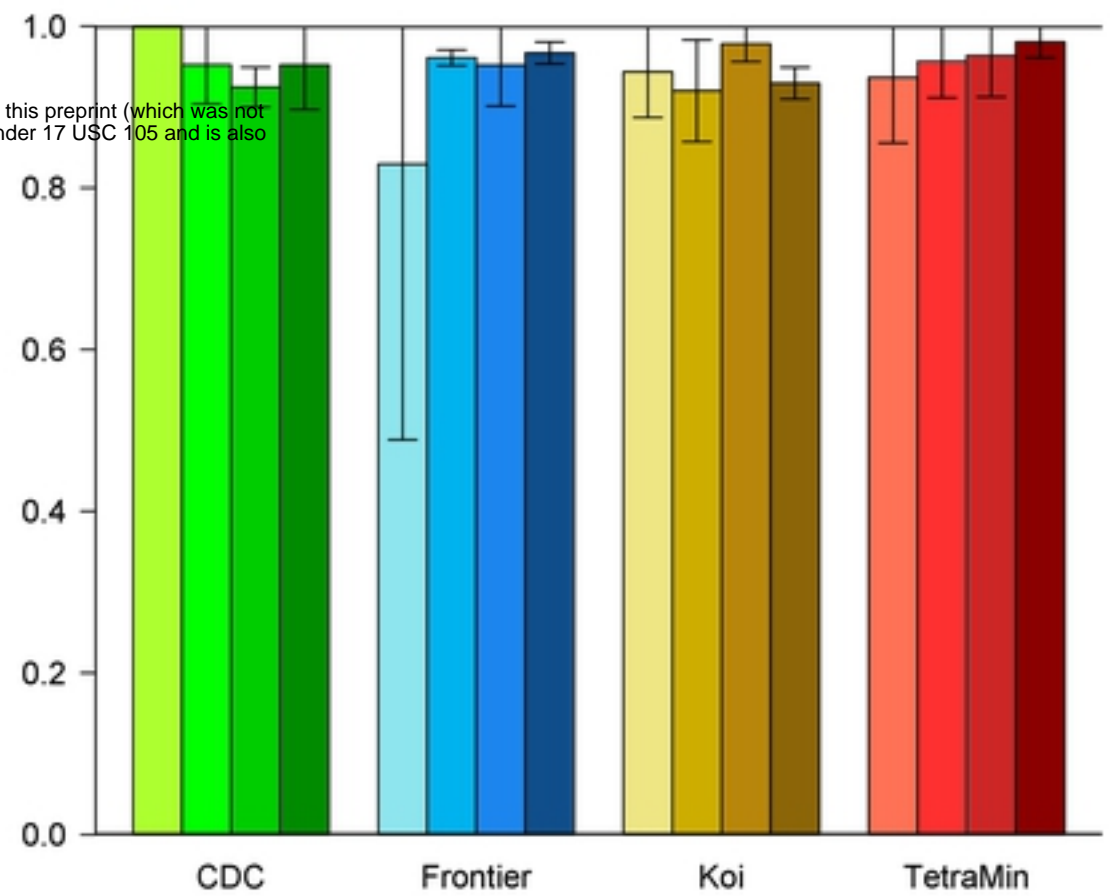

*An. gambiae* females

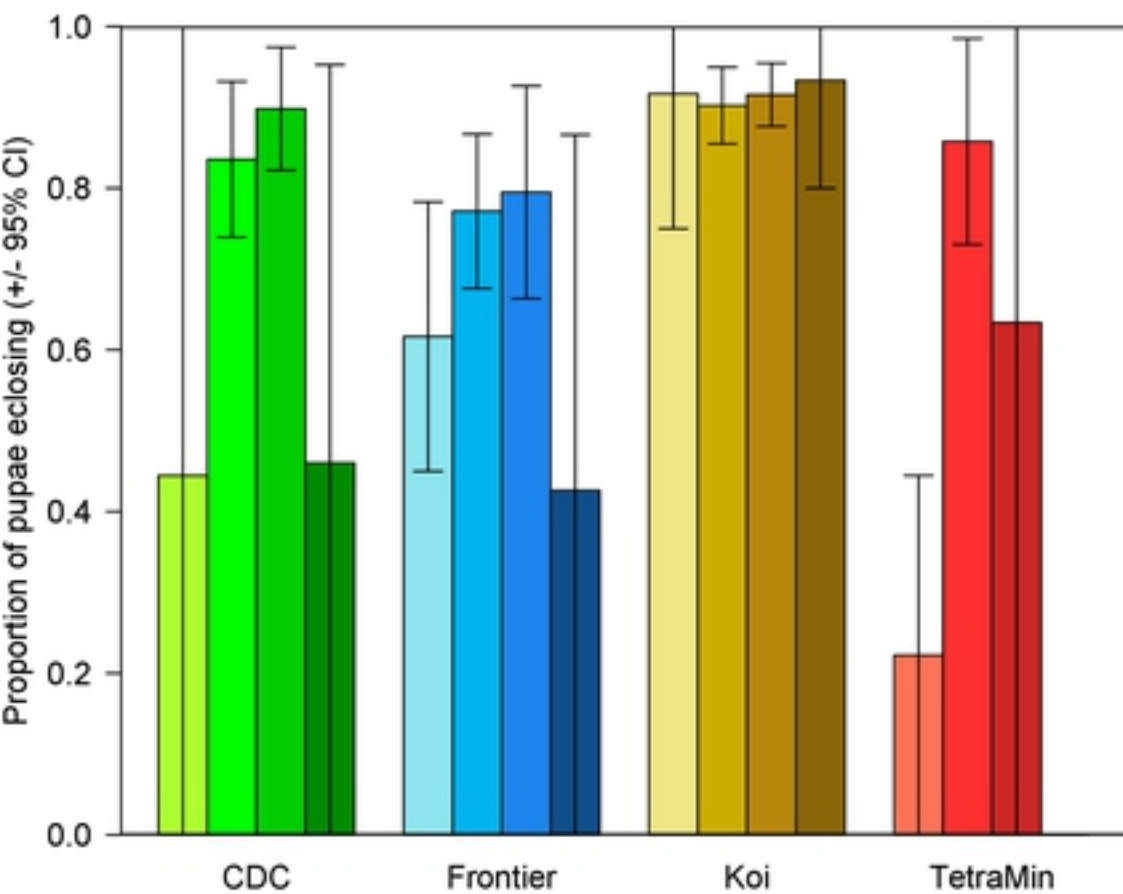

*An. gambiae* males

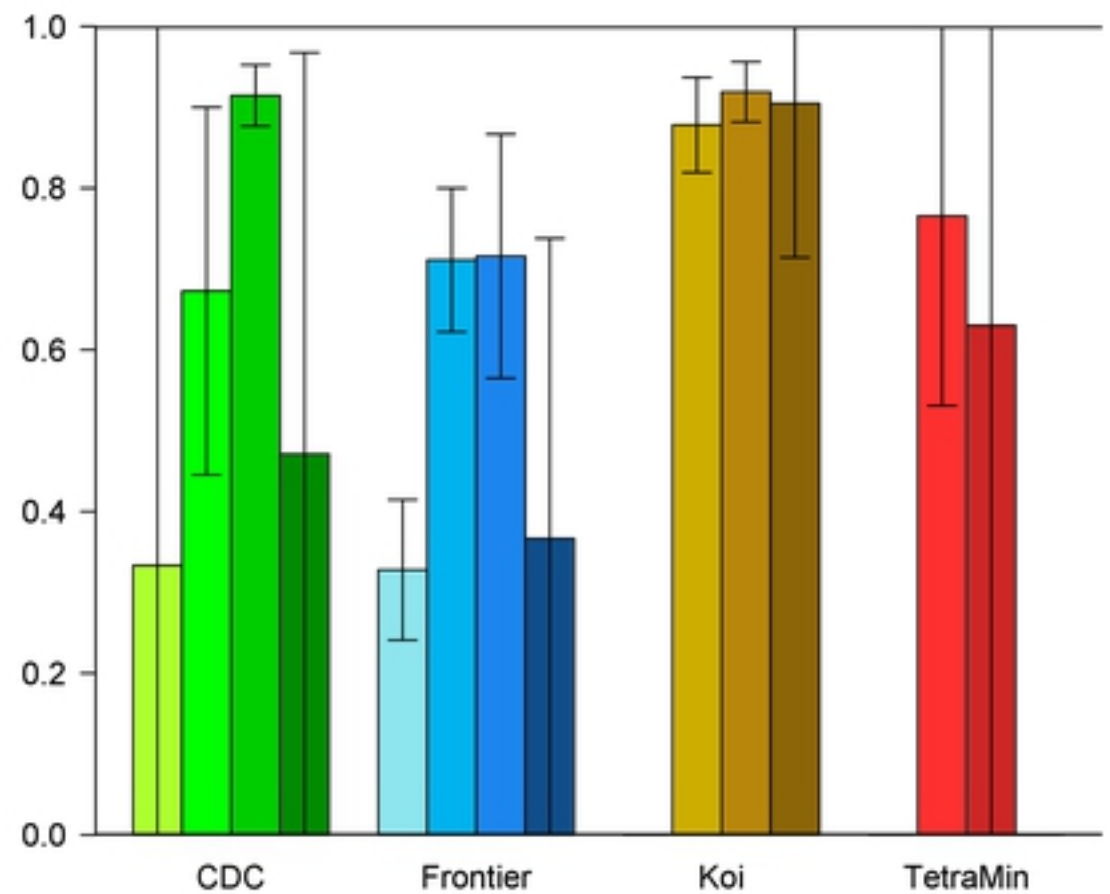

Figure 2

### Females

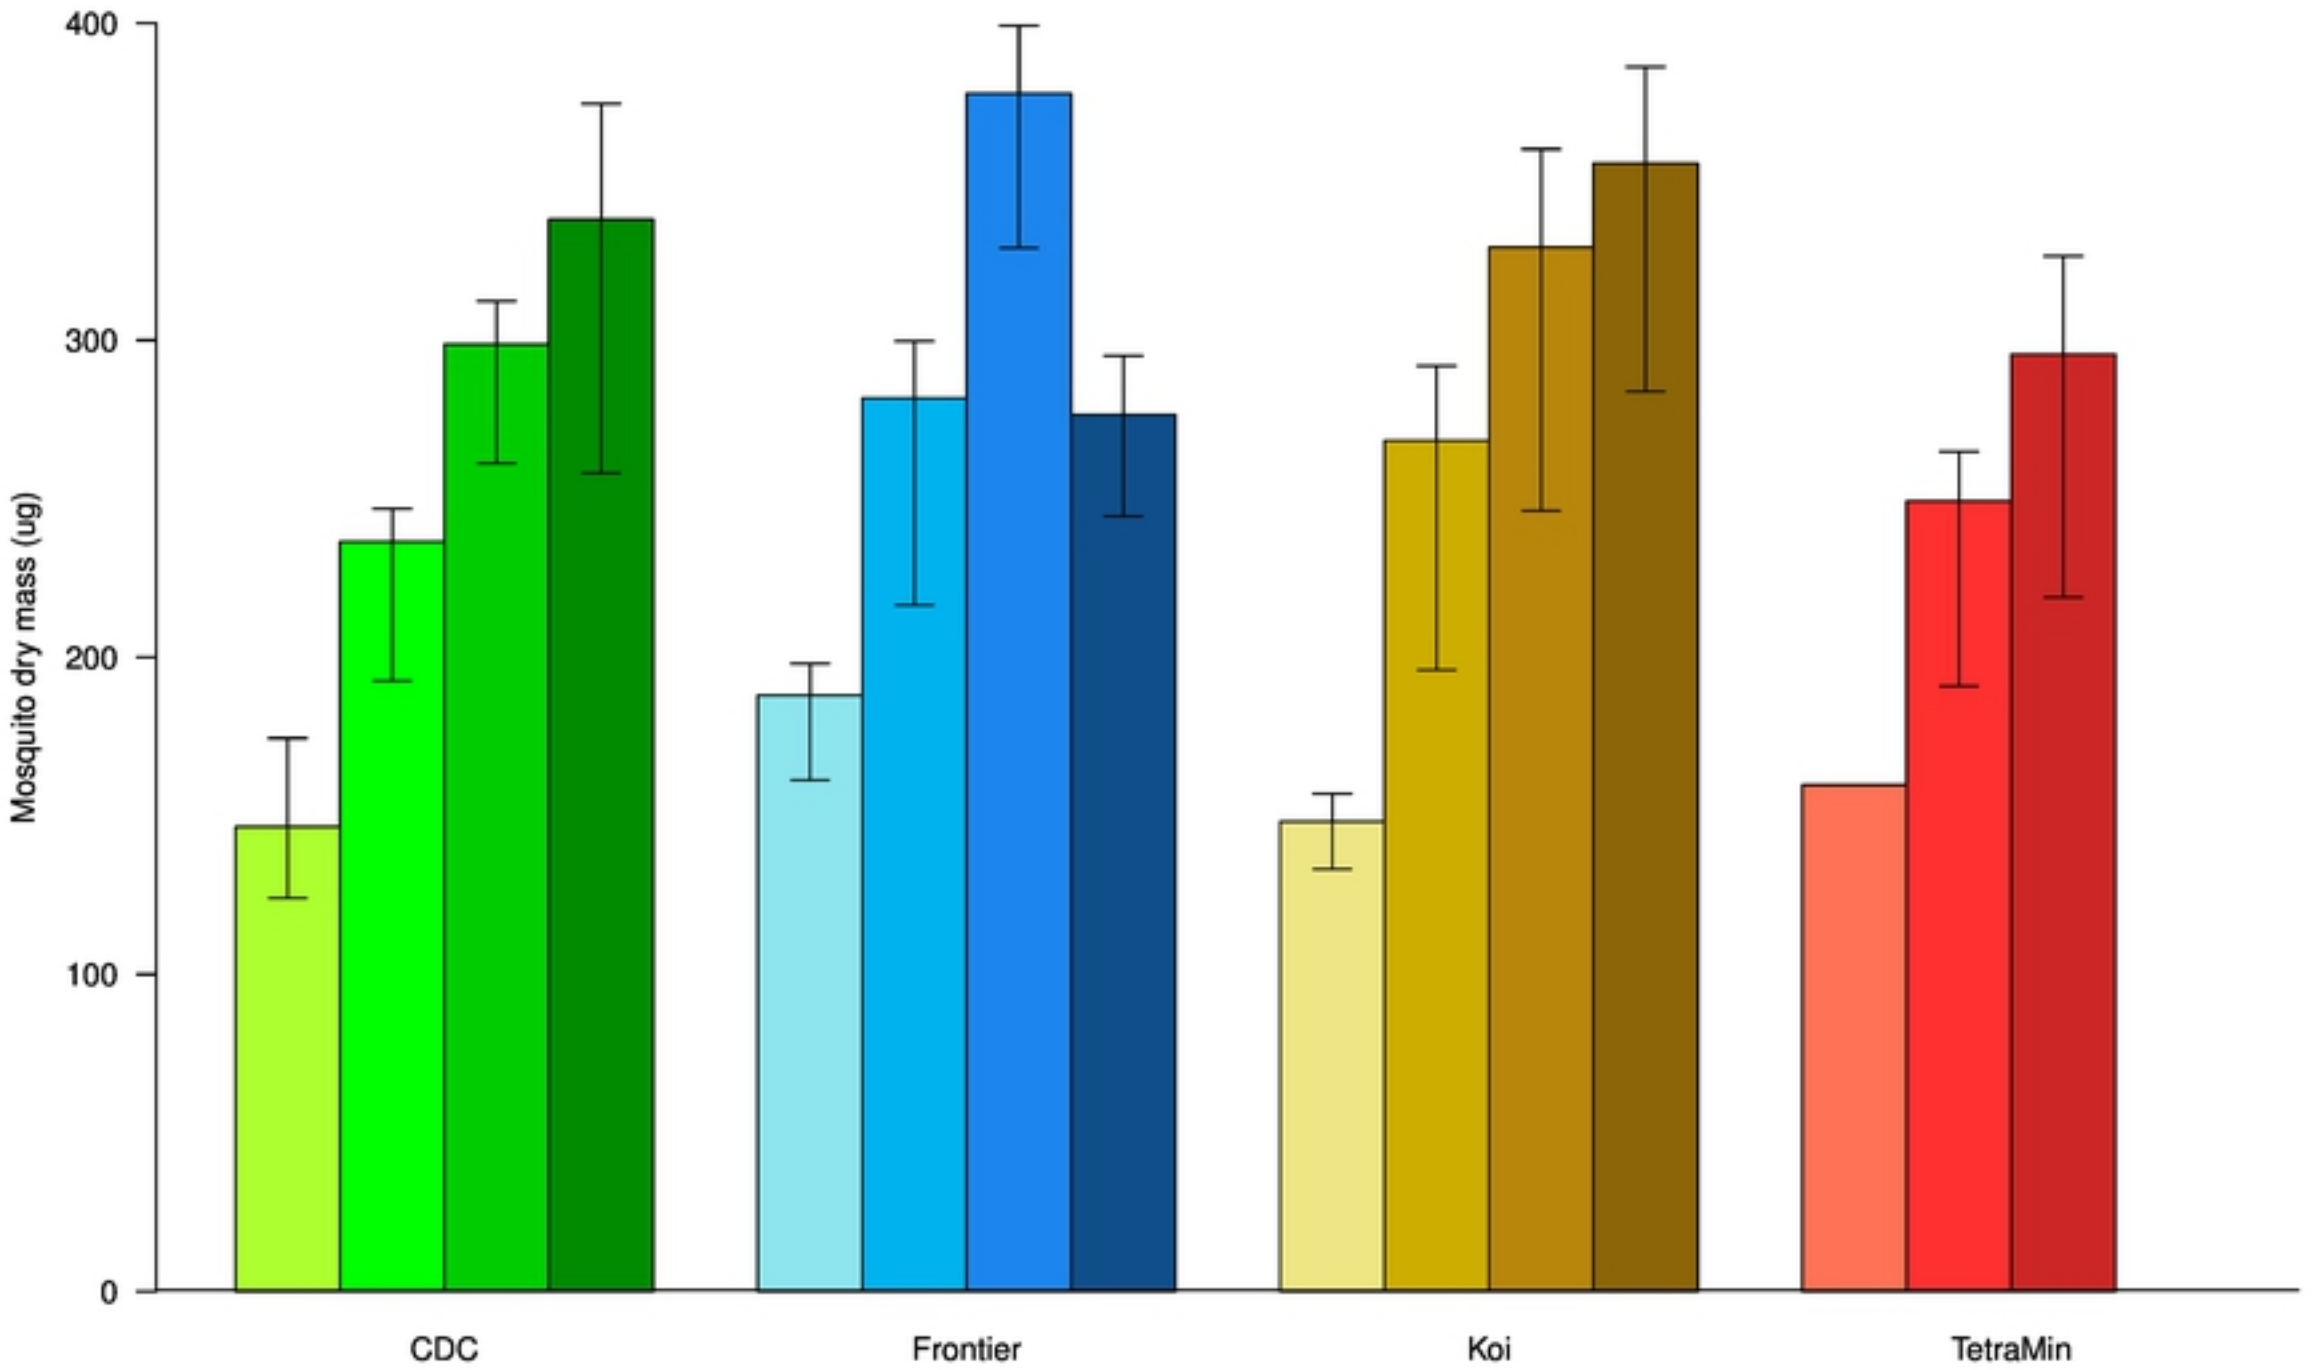

Figure 5a

### Males

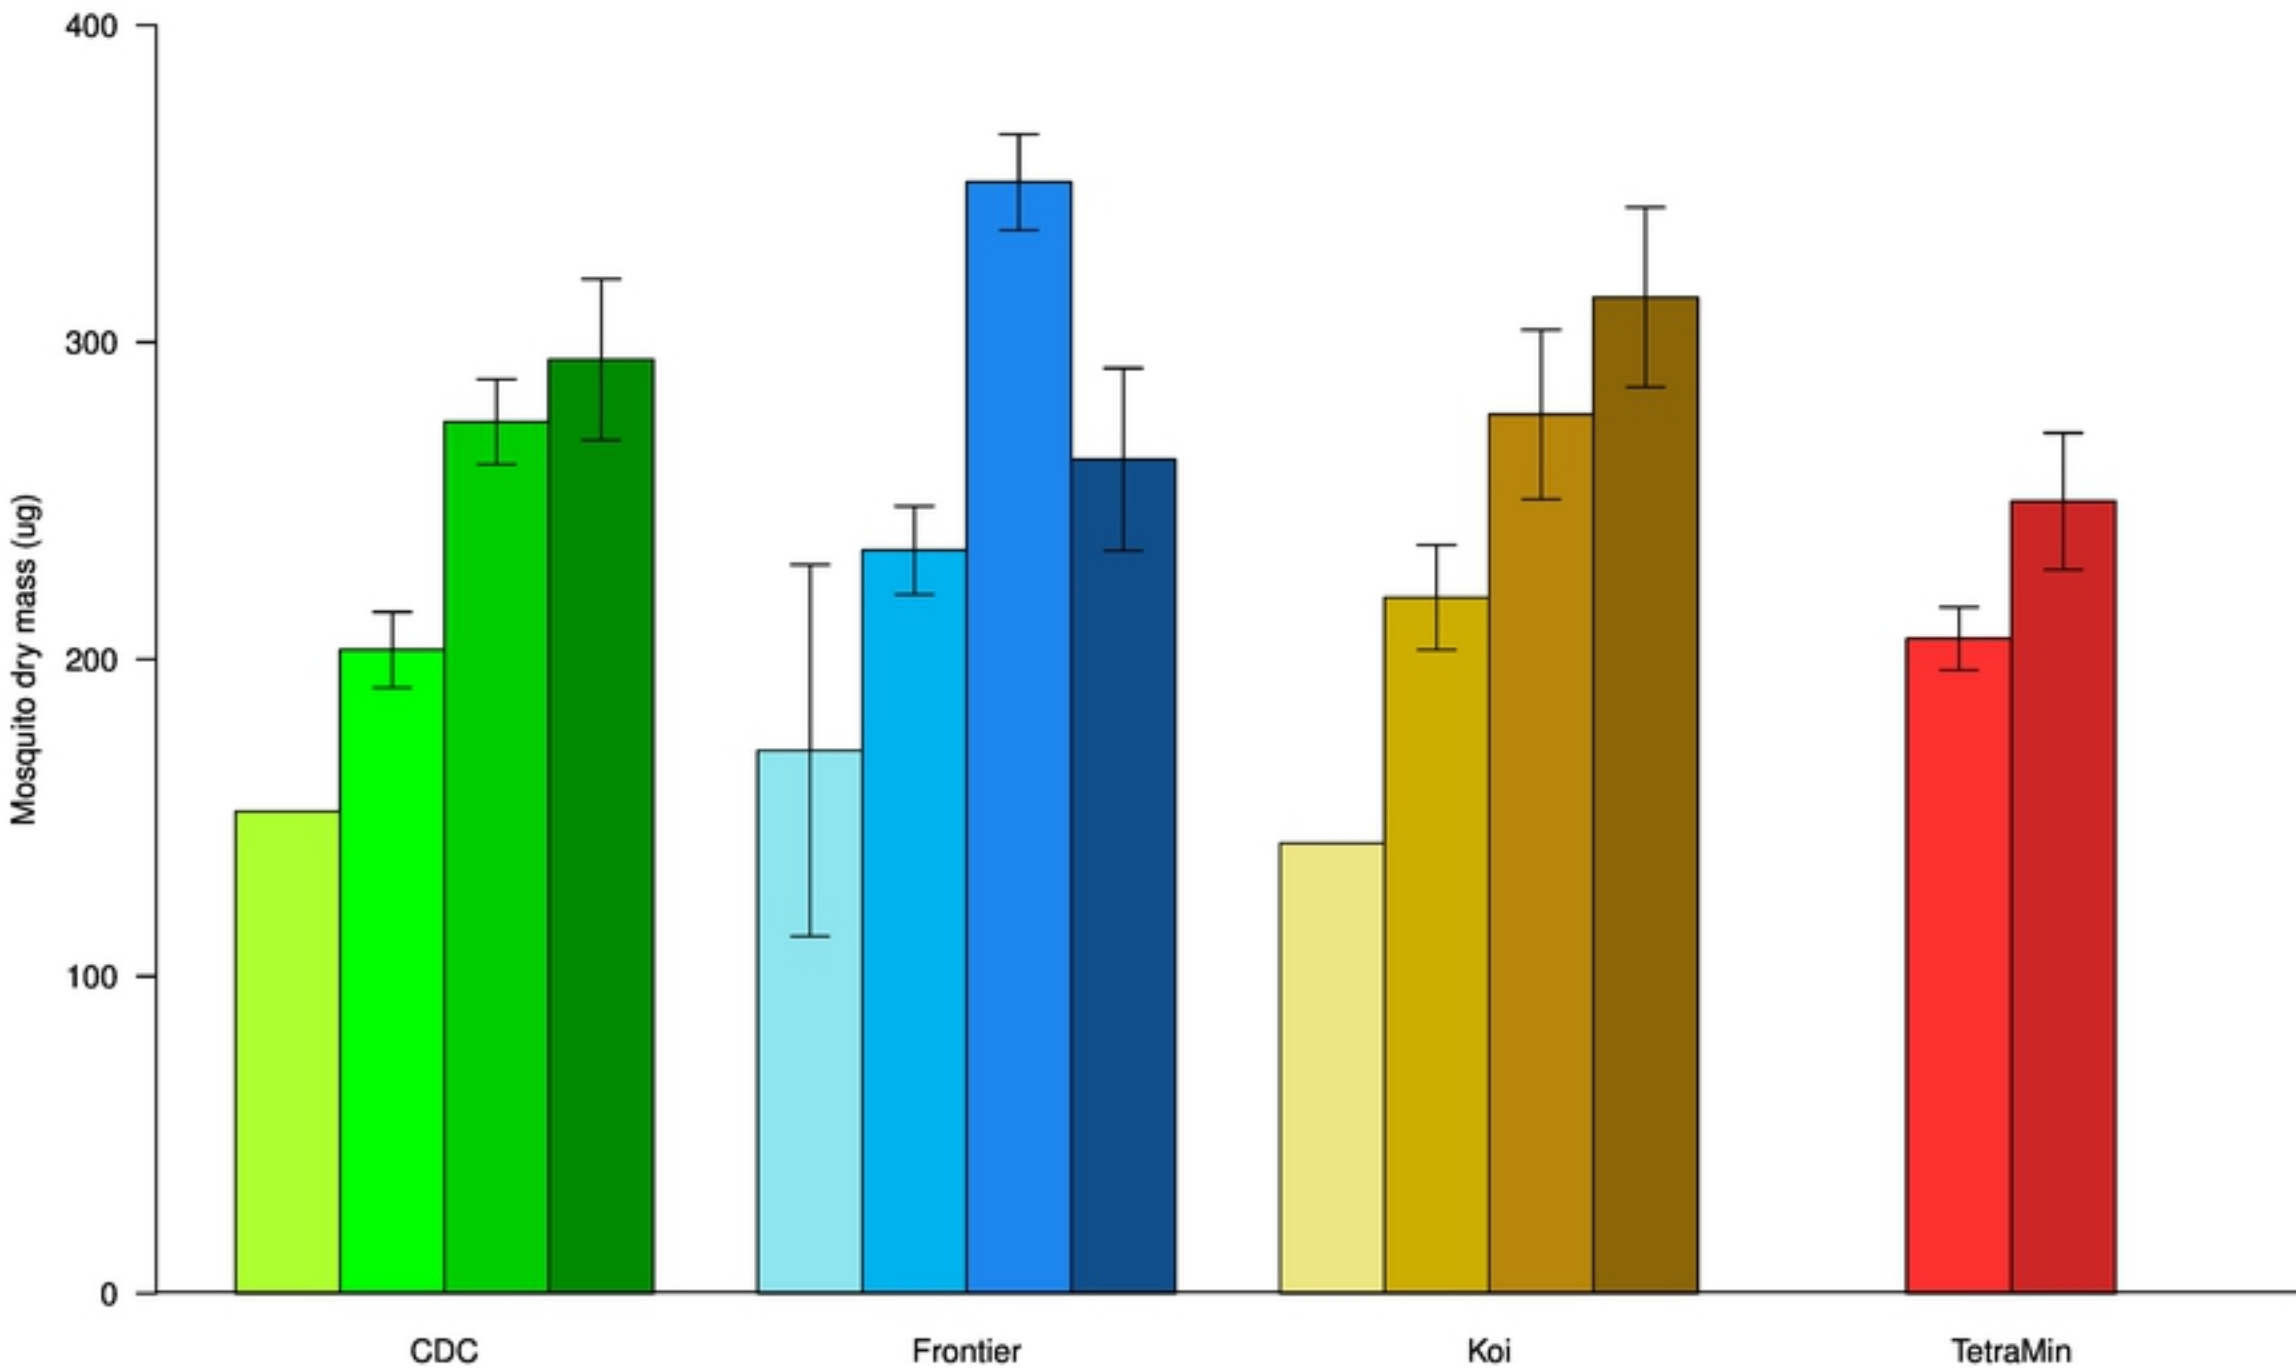

Figure 5b

### Females

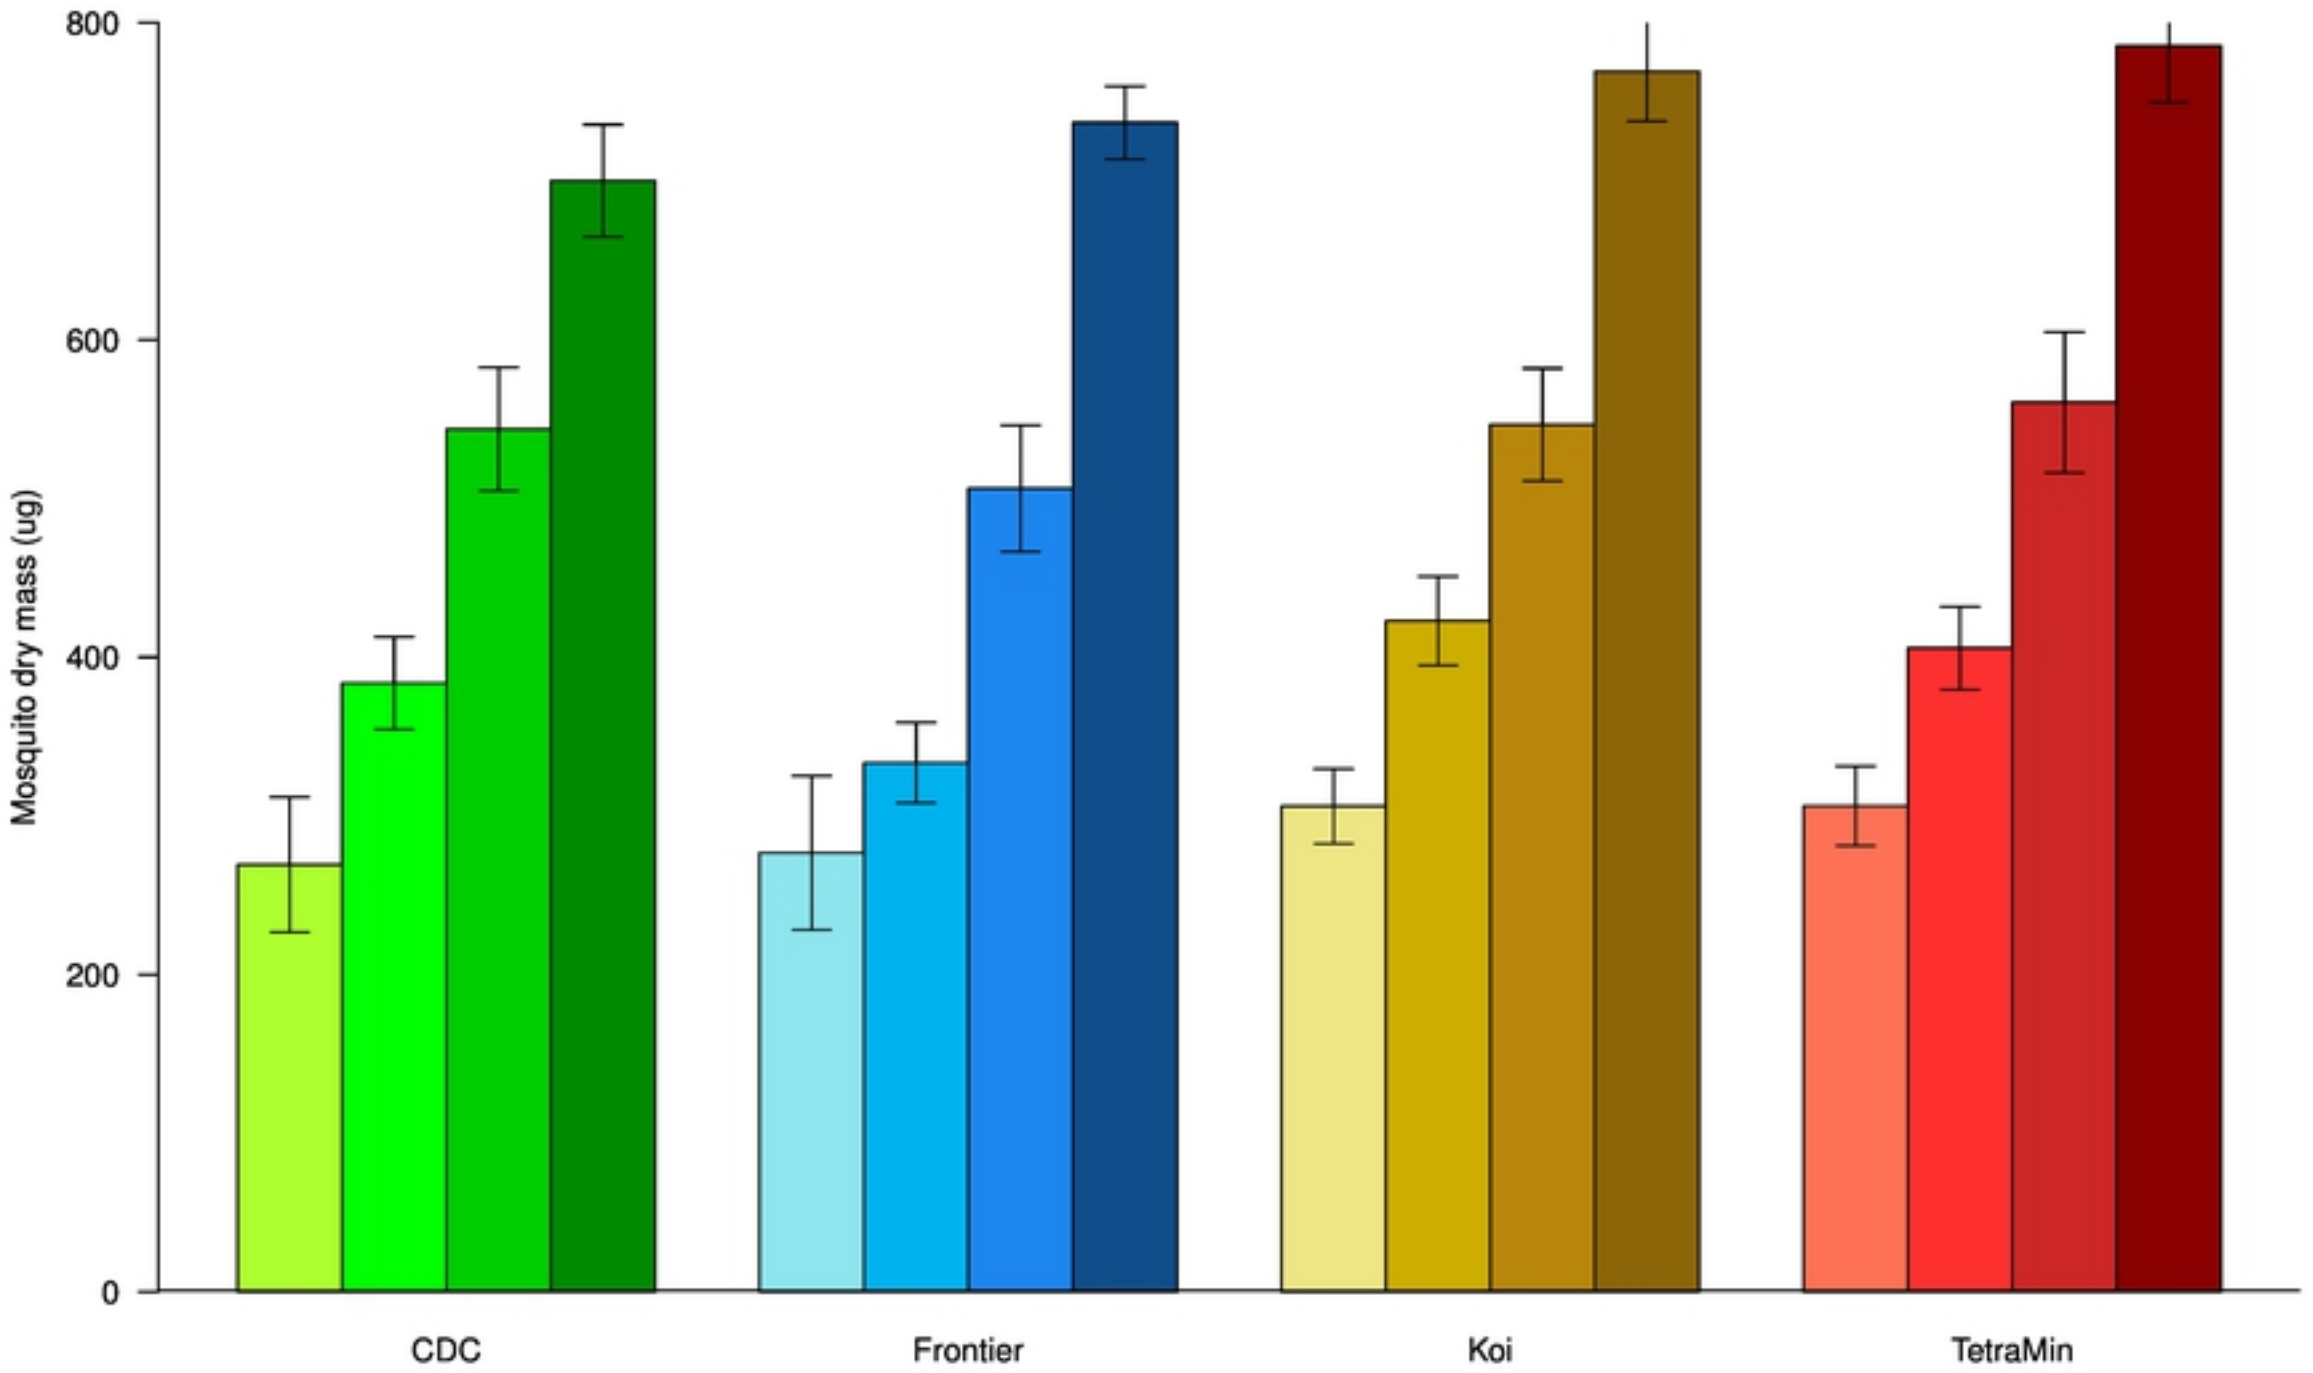

Figure 4a



### Males

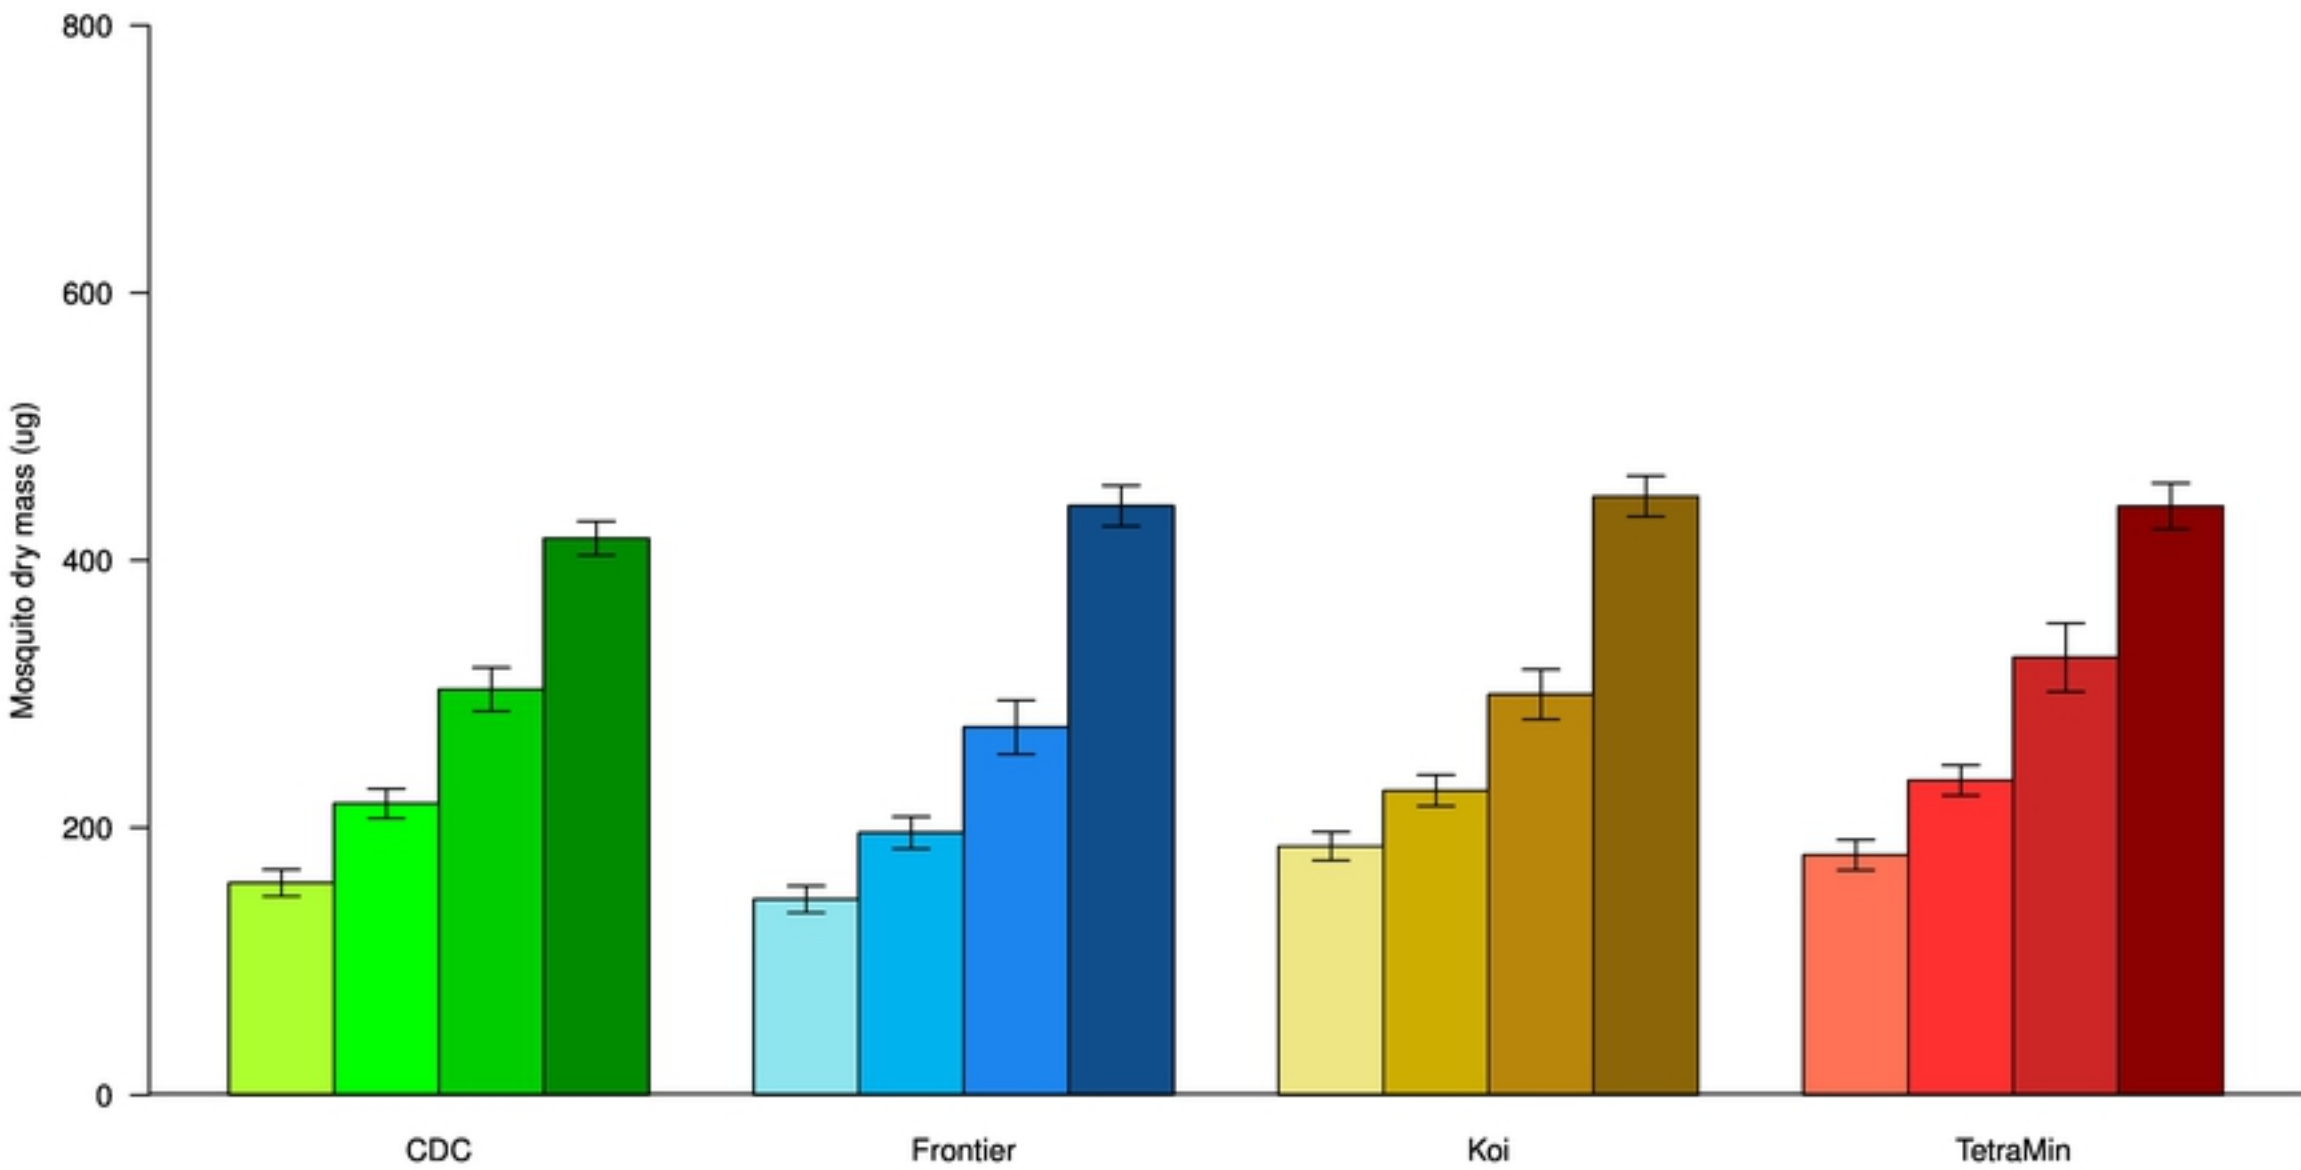

Figure 4b
